# Supplementary material for: Direct access to tetrasubstituted cyclopentenyl scaffolds through a diastereoselective isocyanide-based multicomponent reaction
Source: Royal Society of Chemistry journal article supplement (doi:10.1039/d1sc04158d), 2021-01-01
Supplement: d1sc04158d3.pdf [file d1sc04158d3.pdf]

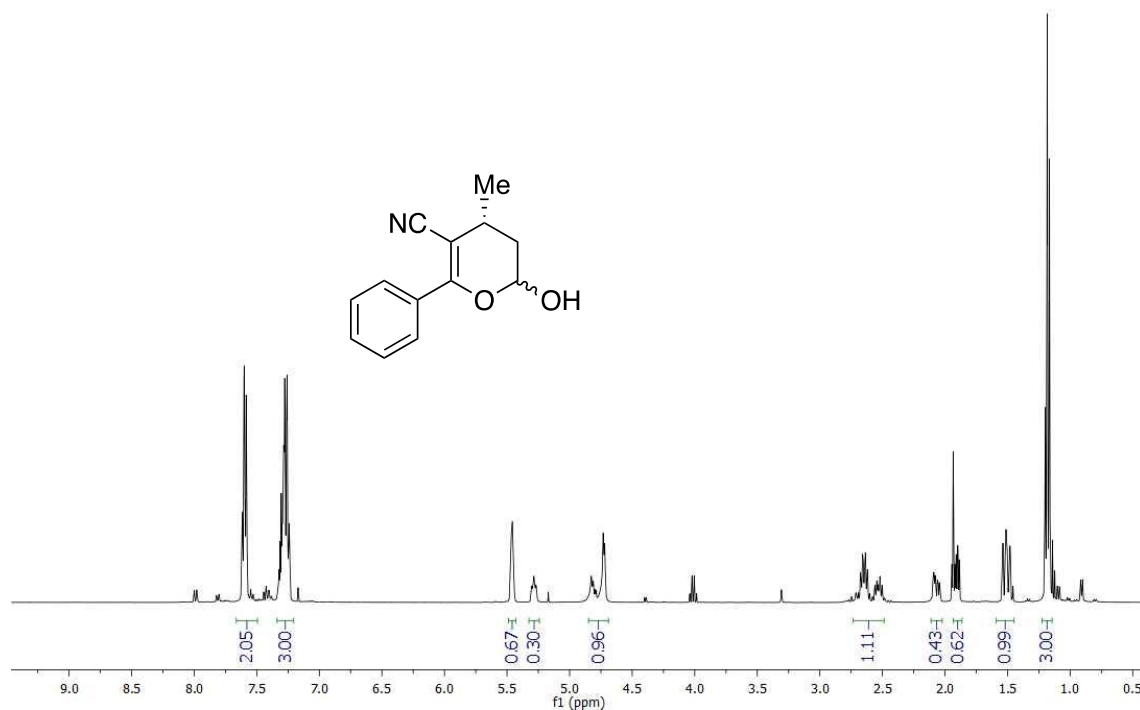

Figure 1. First submission <sup>1</sup>H NMR spectrum in CDCl<sub>3</sub> of compound **1b**.

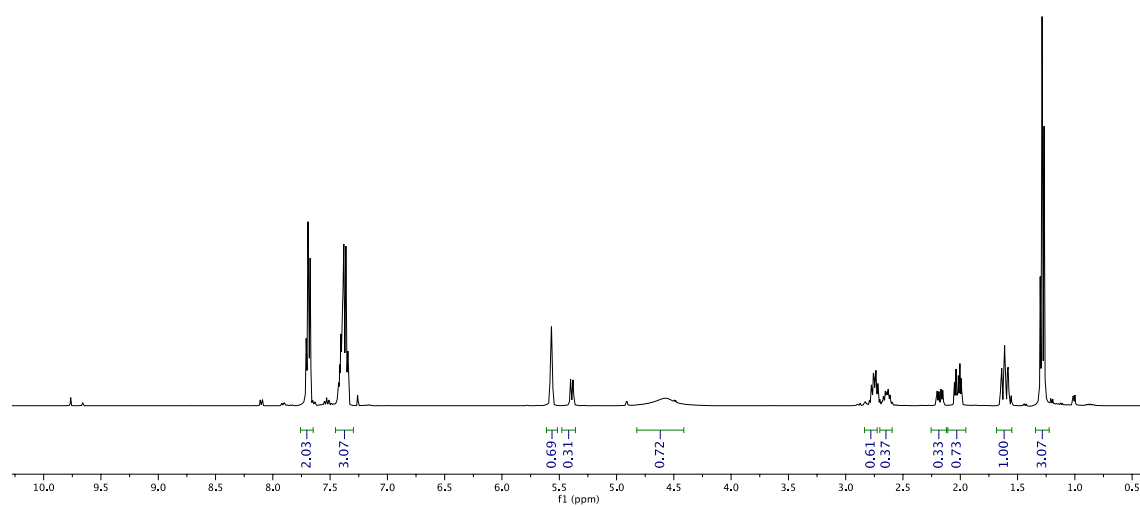

Figure 2. New submission <sup>1</sup>H NMR spectrum in CDCl<sub>3</sub> of compound **1b**.

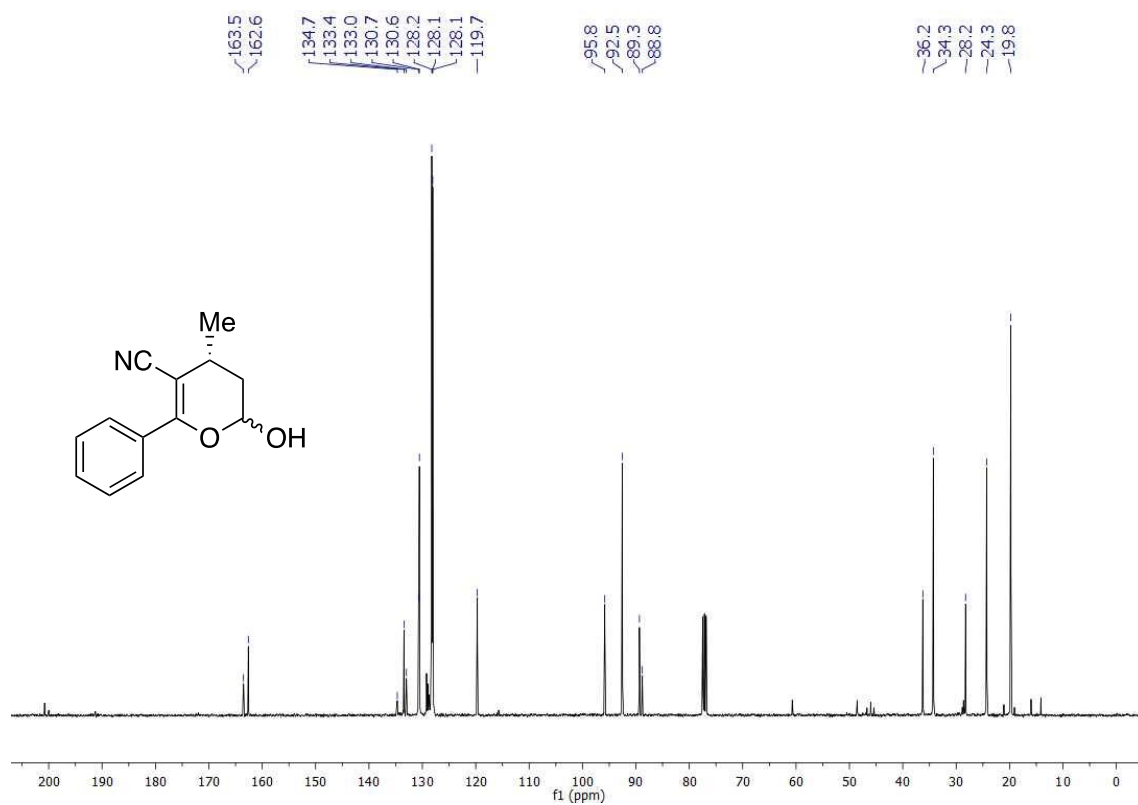

Figure 3. First submission <sup>13</sup>C NMR spectrum in CDCl<sub>3</sub> of compound **1b**.

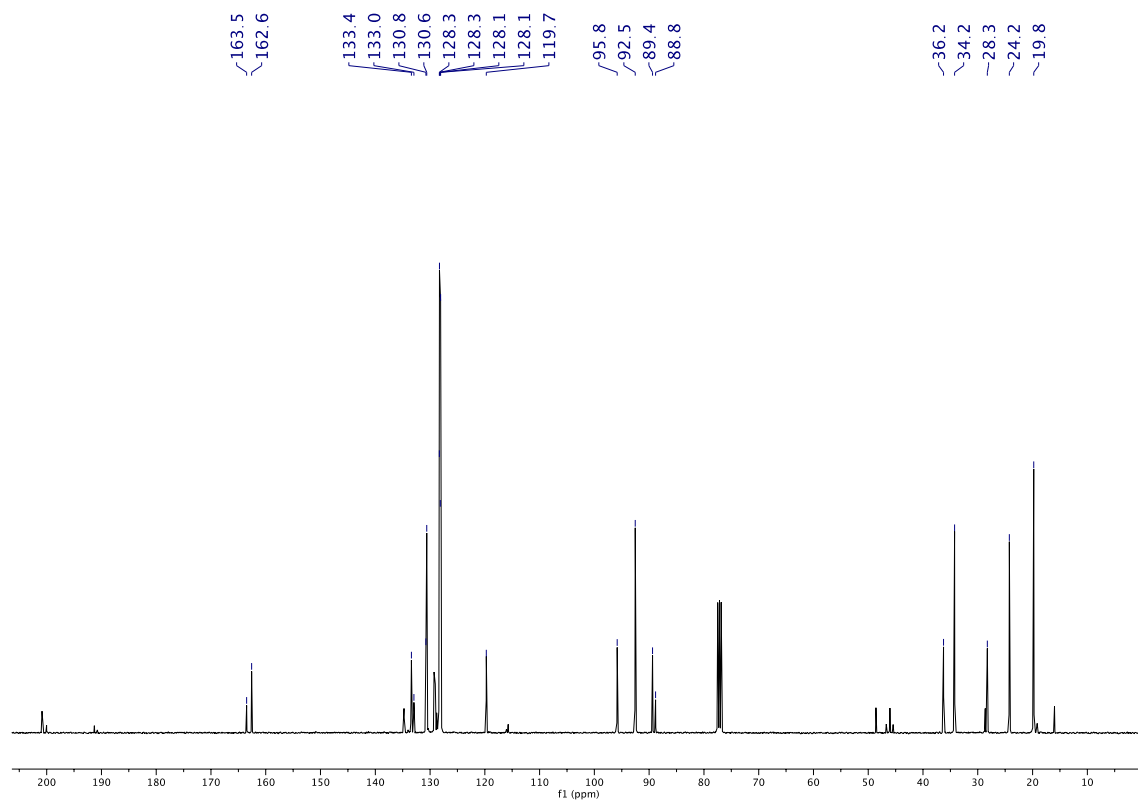

Figure 4. New submission <sup>13</sup>C NMR spectrum in CDCl<sub>3</sub> of compound **1b**.

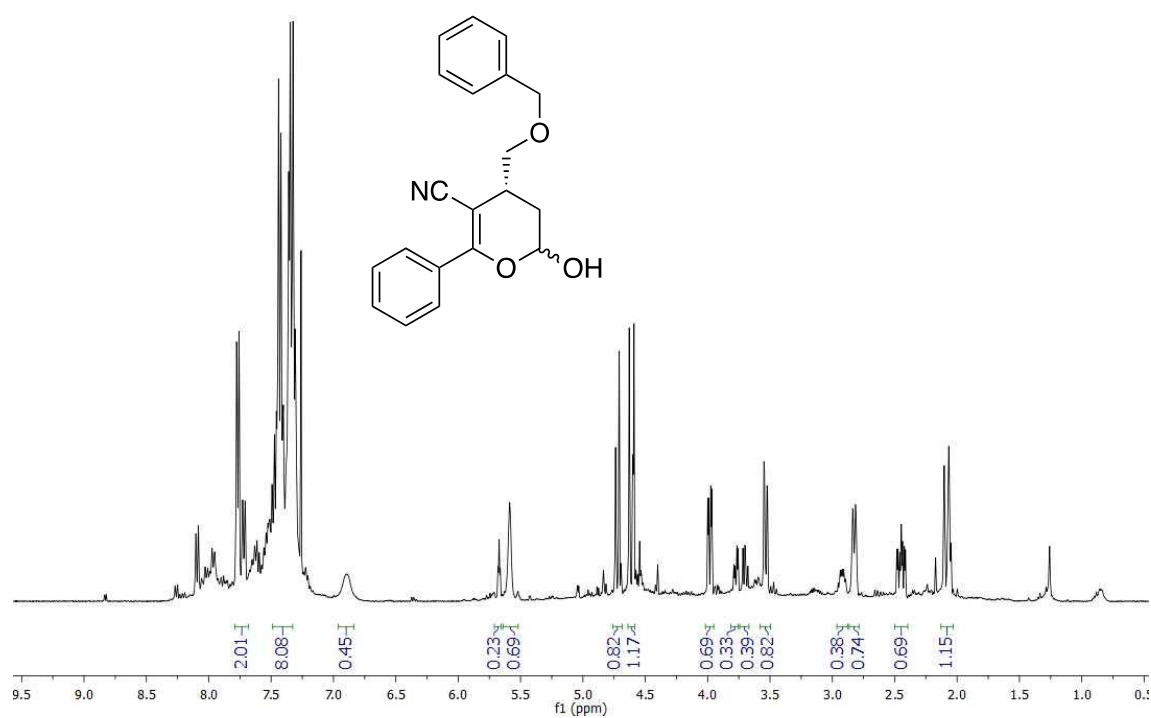

Figure 5. First submission <sup>1</sup>H NMR spectrum in CDCl<sub>3</sub> of compound **1f**.

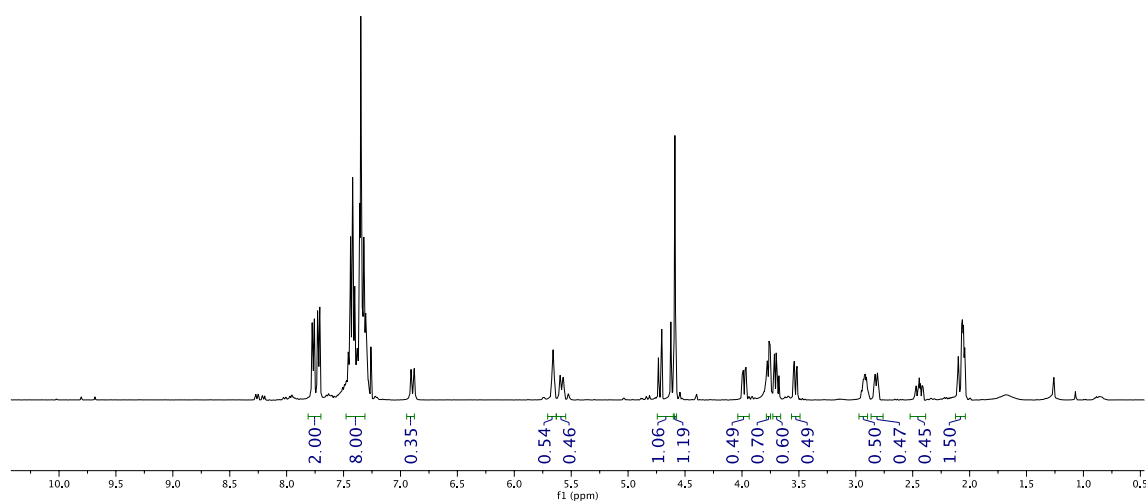

Figure 6. New submission <sup>1</sup>H NMR spectrum in CDCl<sub>3</sub> of compound **1f**.

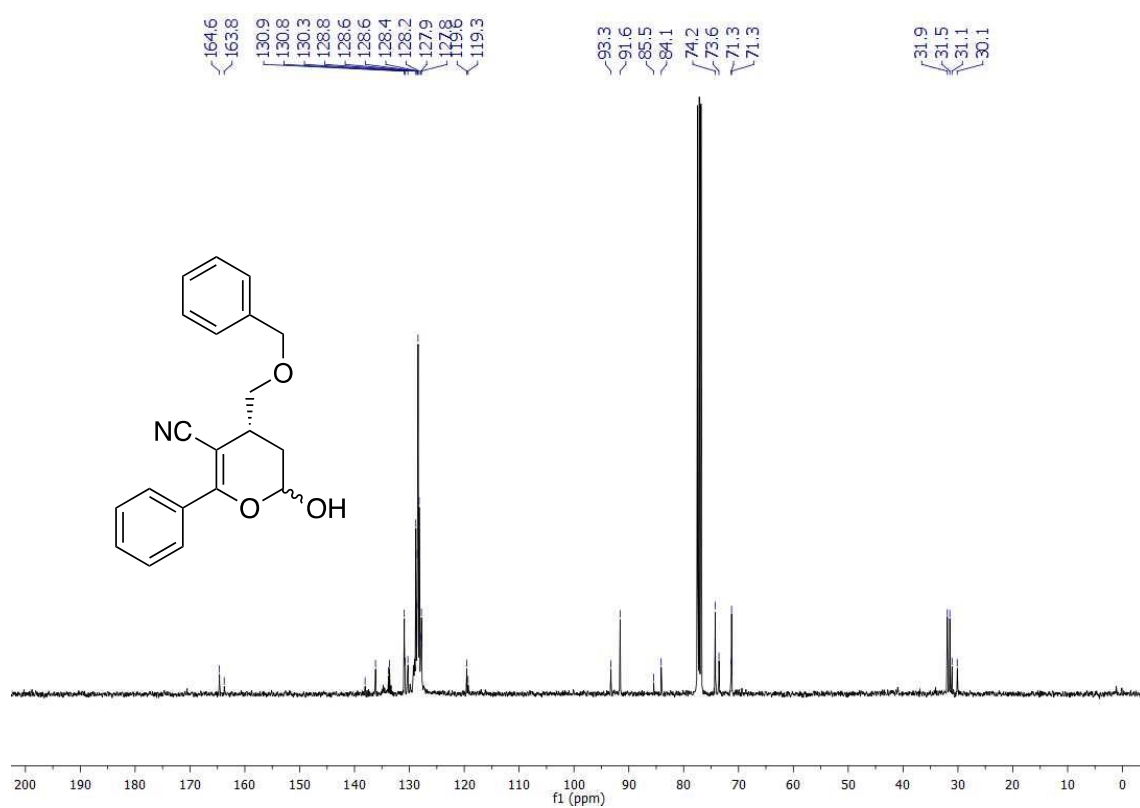

Figure 7. First submission <sup>13</sup>C NMR spectrum in CDCl<sub>3</sub> of compound **1f**.

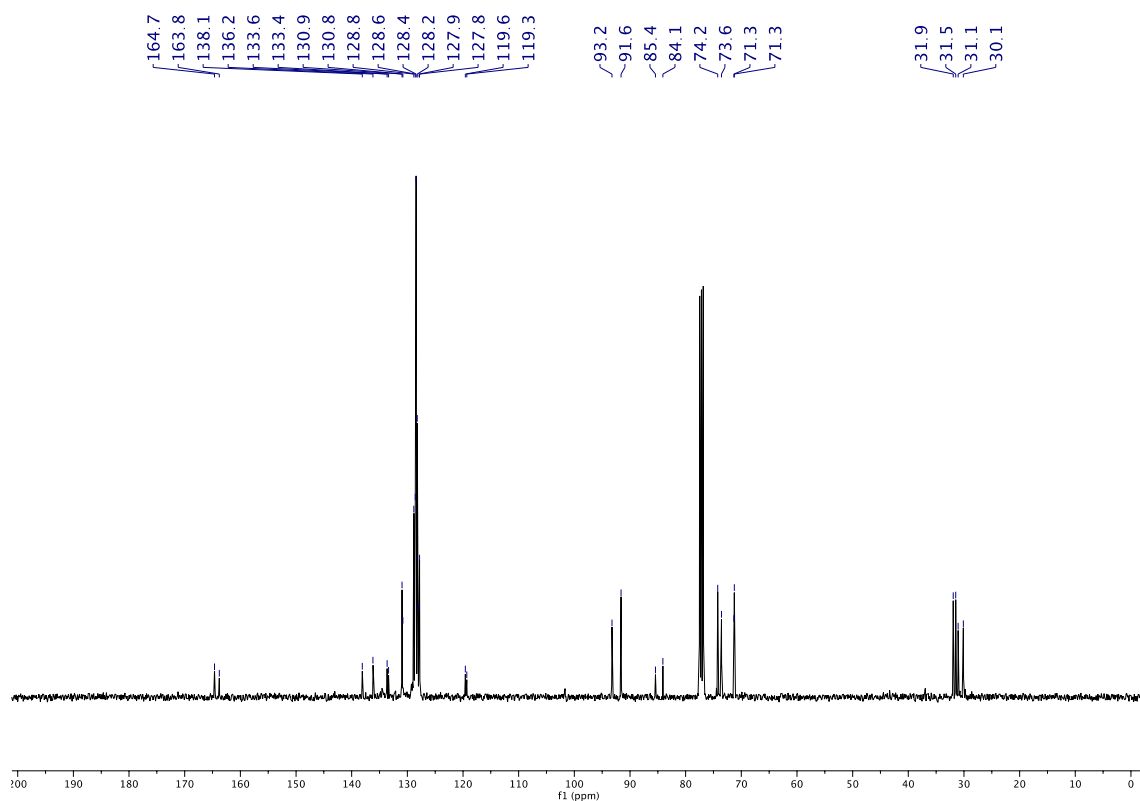

Figure 8. New submission <sup>13</sup>C NMR spectrum in CDCl<sub>3</sub> of compound **1f**.

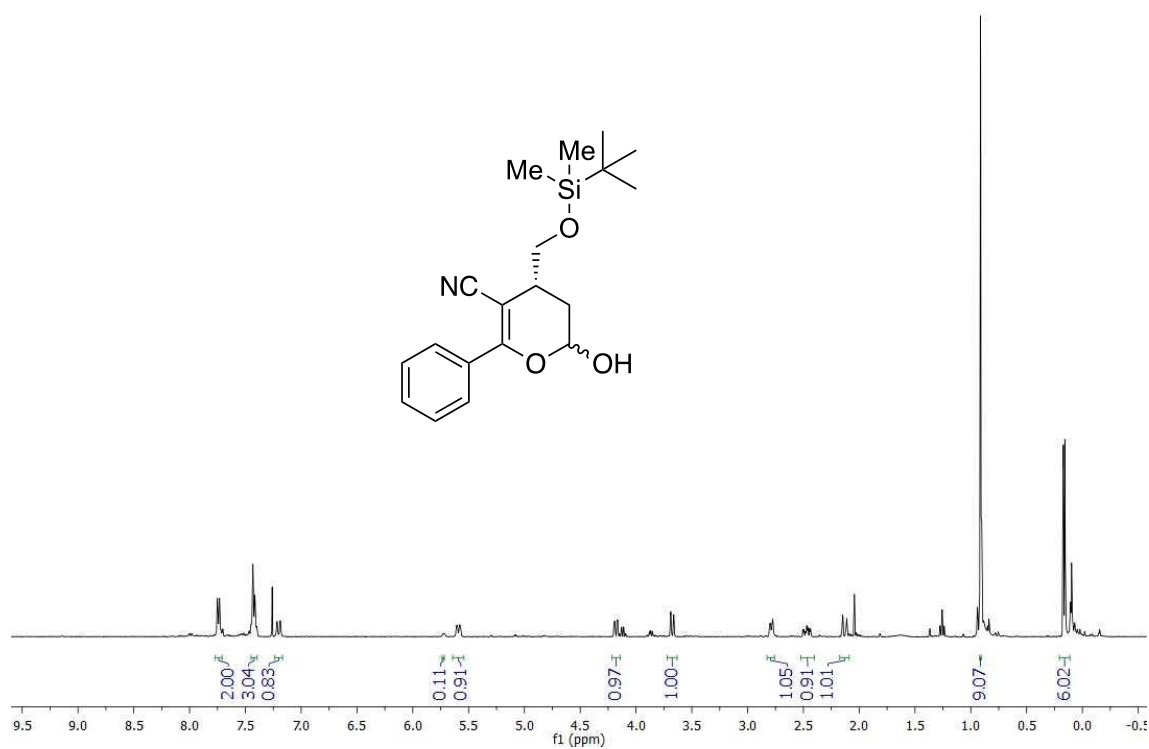

Figure 9. First submission <sup>1</sup>H NMR spectrum in CDCl<sub>3</sub> of compound **1g**.

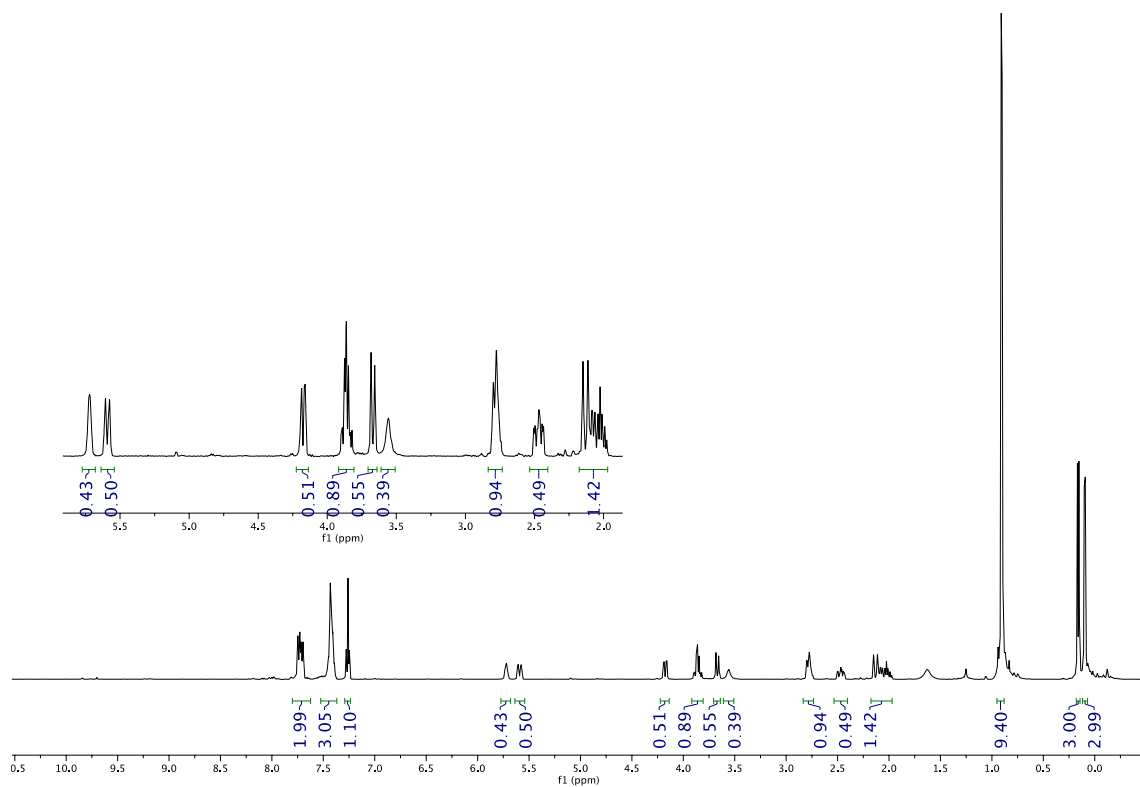

Figure 10. New submission <sup>1</sup>H NMR spectrum in CDCl<sub>3</sub> of compound **1g**.

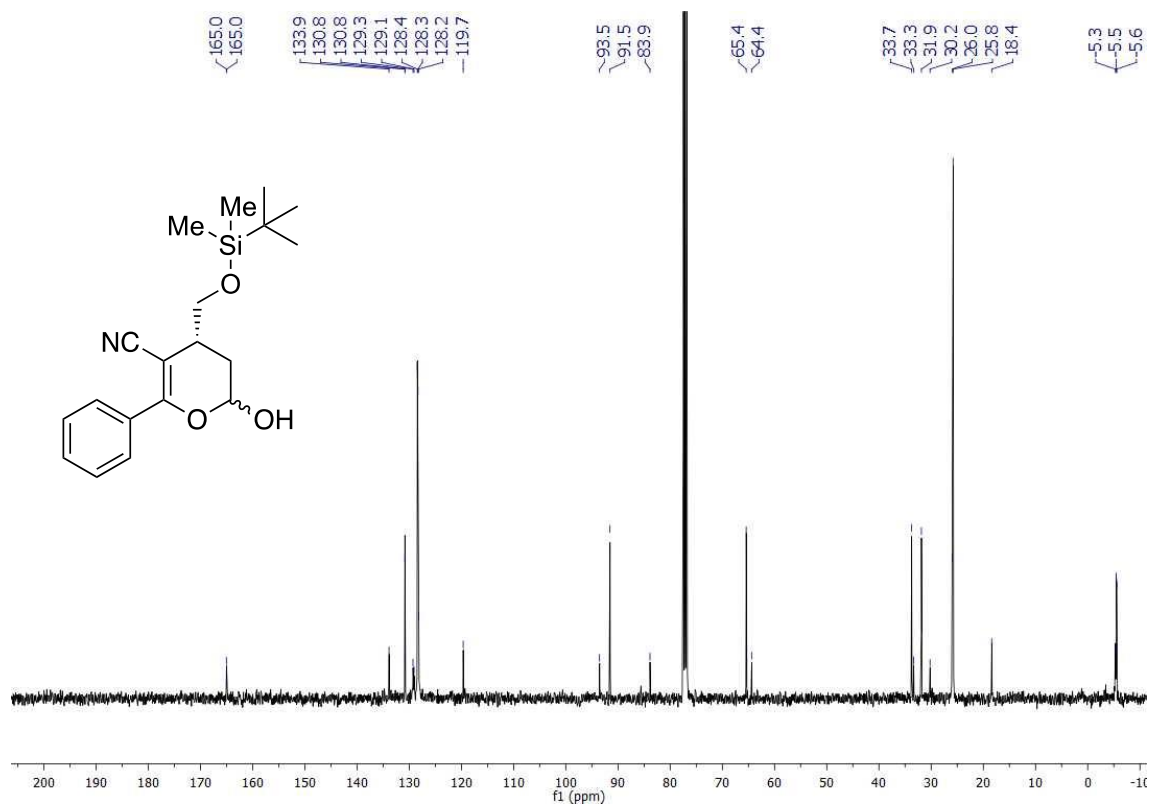

Figure 11. First submission <sup>13</sup>C NMR spectrum in CDCl<sub>3</sub> of compound **1g**.

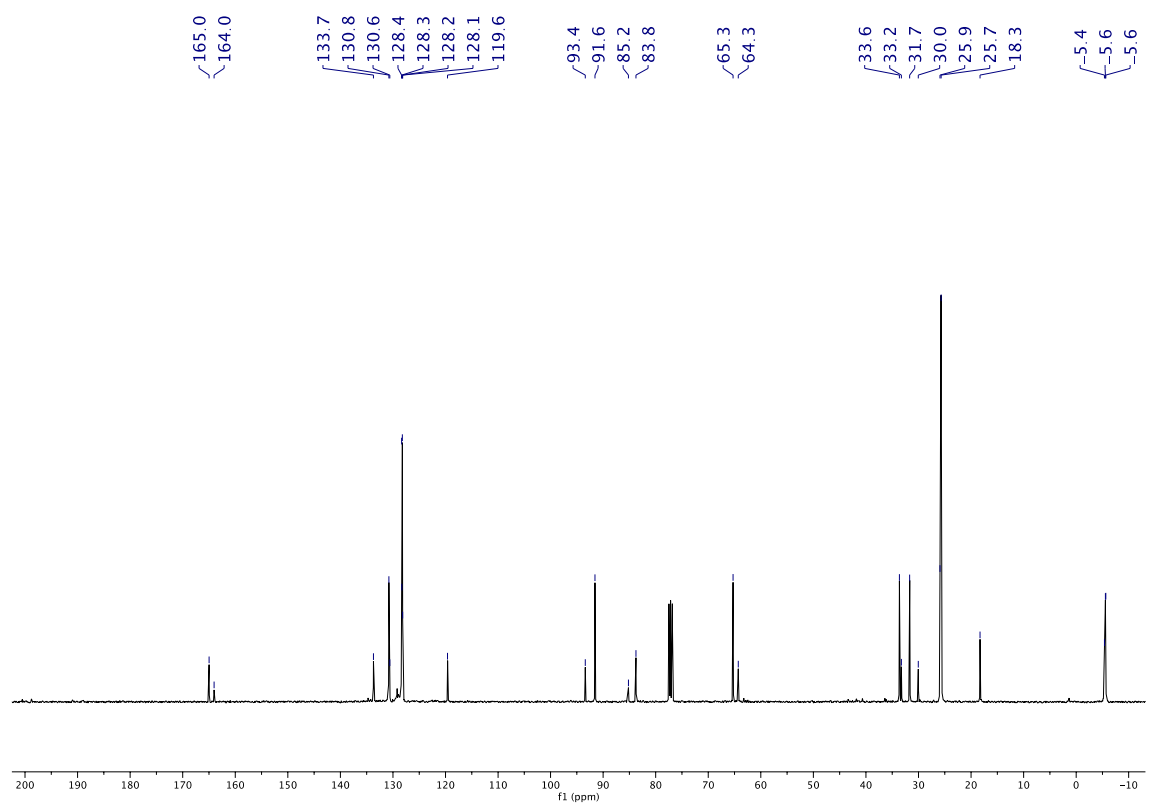

Figure 12. New submission <sup>13</sup>C NMR spectrum in CDCl<sub>3</sub> of compound **1g**.

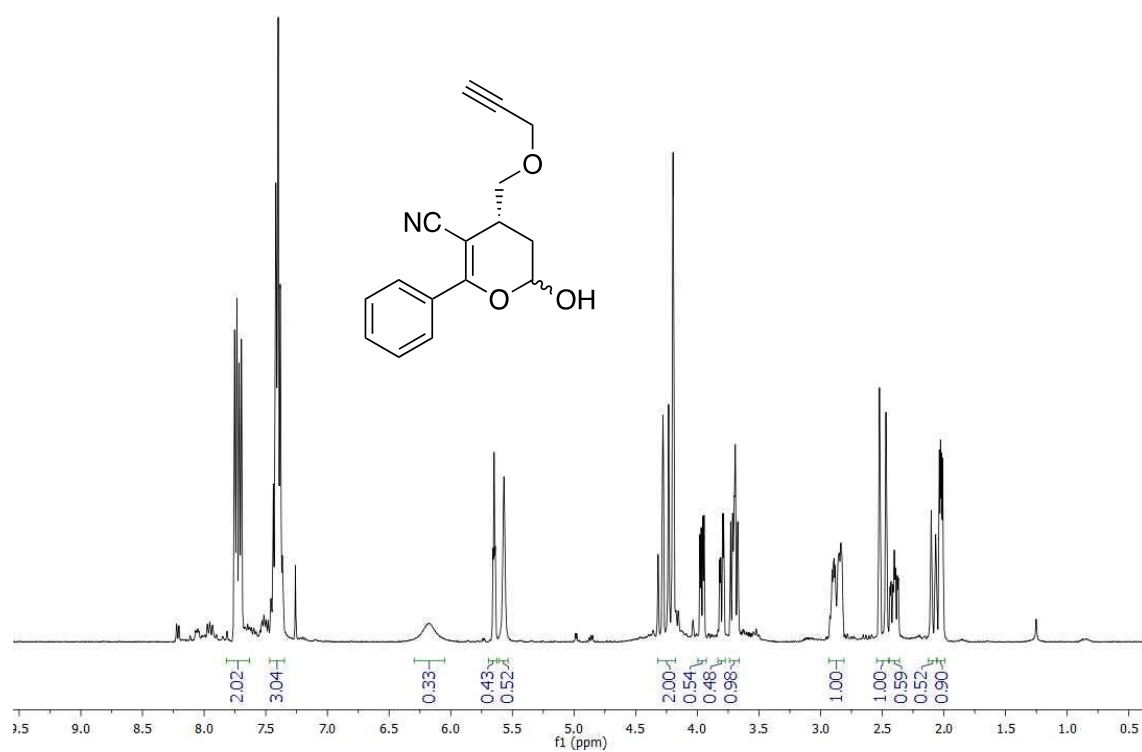

Figure 13. First submission <sup>1</sup>H NMR spectrum in CDCl<sub>3</sub> of compound **1h**.

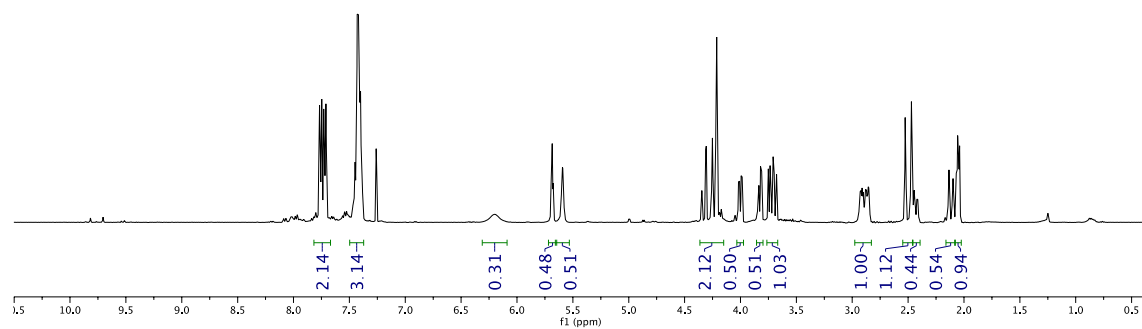

Figure 14. New submission <sup>1</sup>H NMR spectrum in CDCl<sub>3</sub> of compound **1h**.

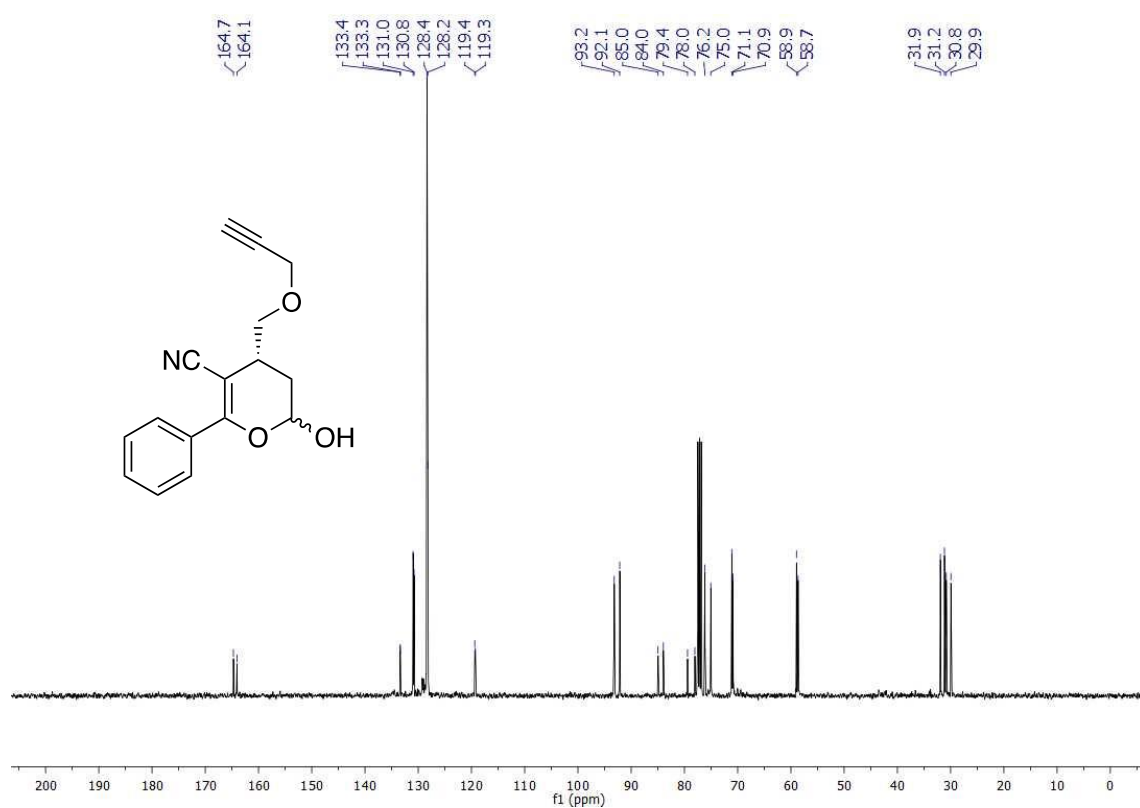

Figure 15. First submission <sup>13</sup>C NMR spectrum in CDCl<sub>3</sub> of compound **1h**.

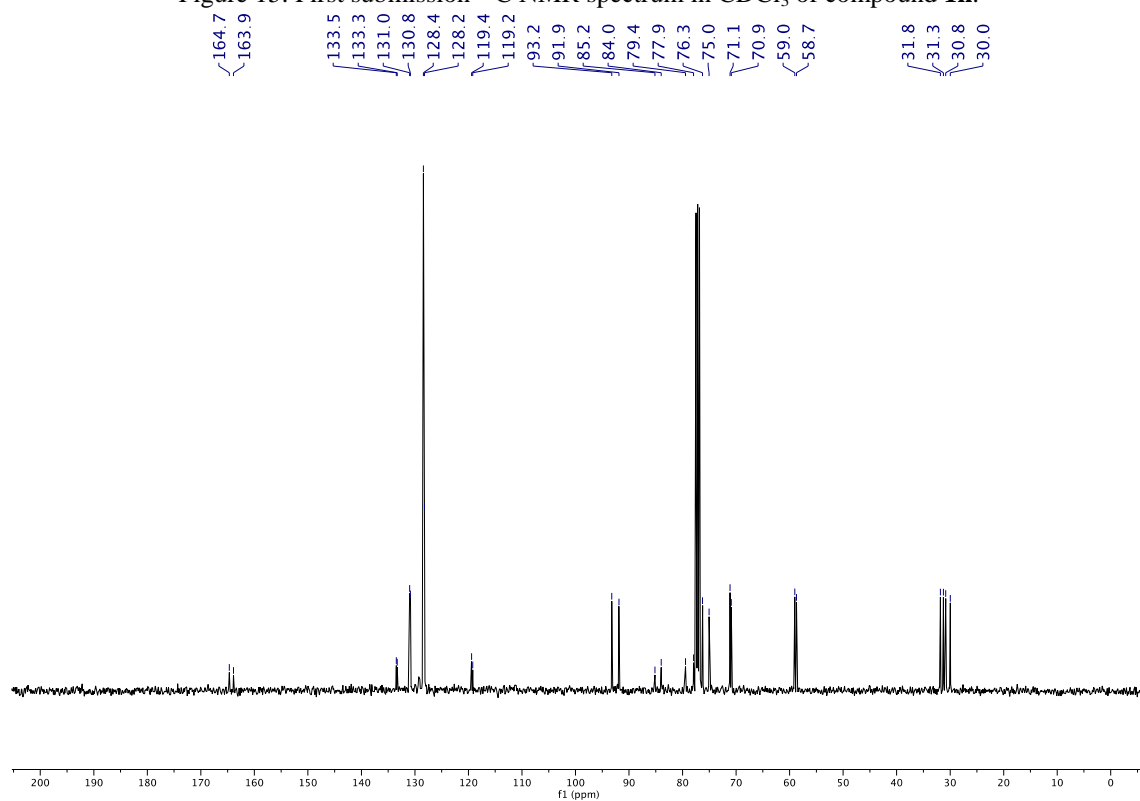

Figure 16. New submission <sup>13</sup>C NMR spectrum in CDCl<sub>3</sub> of compound **1h**.



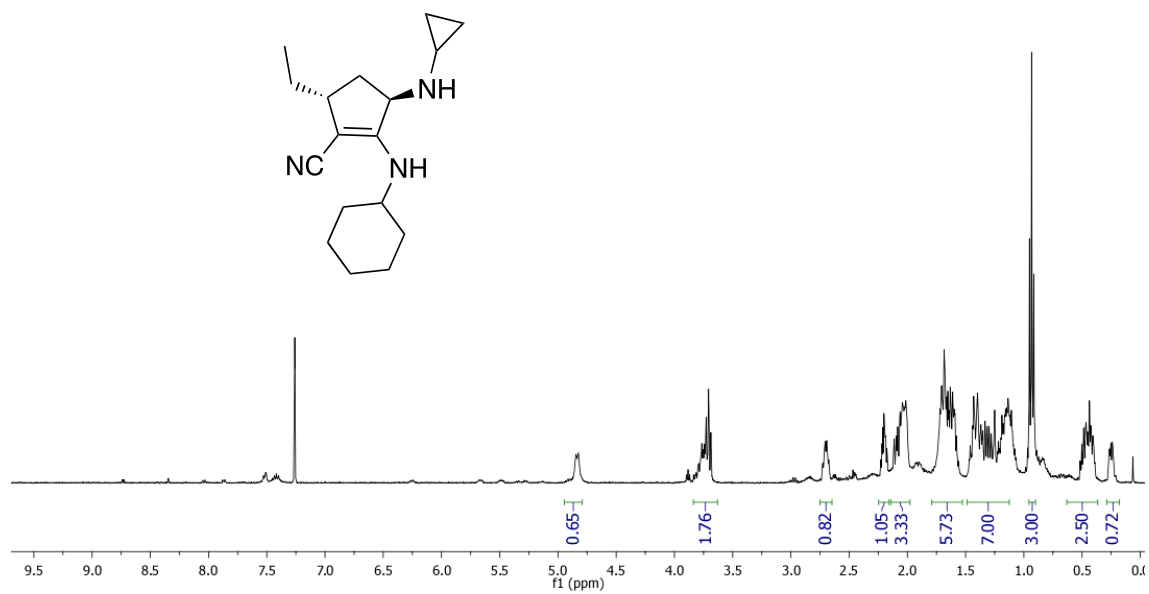

Figure 17. First submission <sup>1</sup>H NMR spectrum in CDCl<sub>3</sub> of compound **2b**.

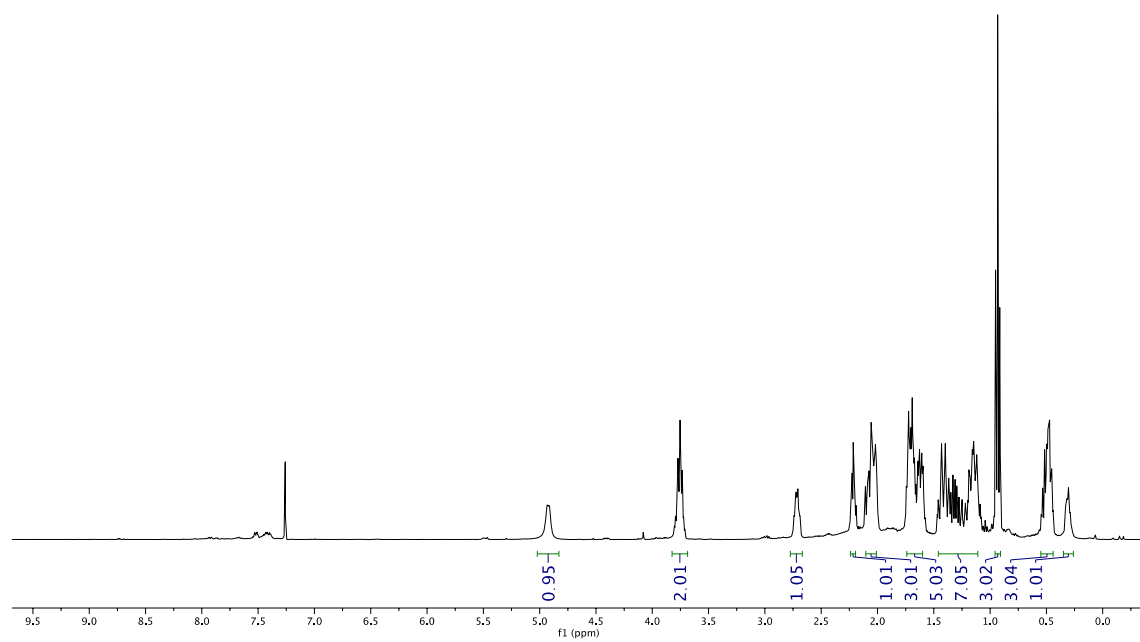

Figure 18. New submission <sup>1</sup>H NMR spectrum in CDCl<sub>3</sub> of compound **2b**.

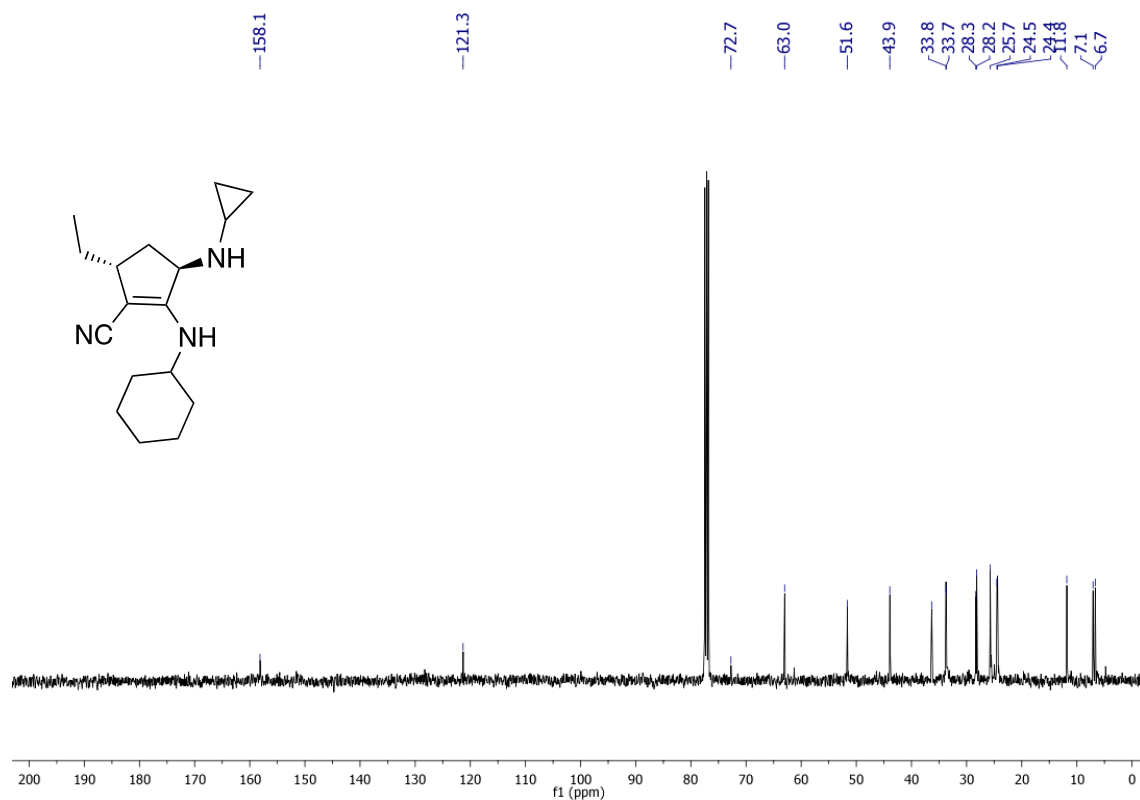

Figure 19. First submission  $^{13}\text{C}$  NMR spectrum in CDCl<sub>3</sub> of compound **2b**.

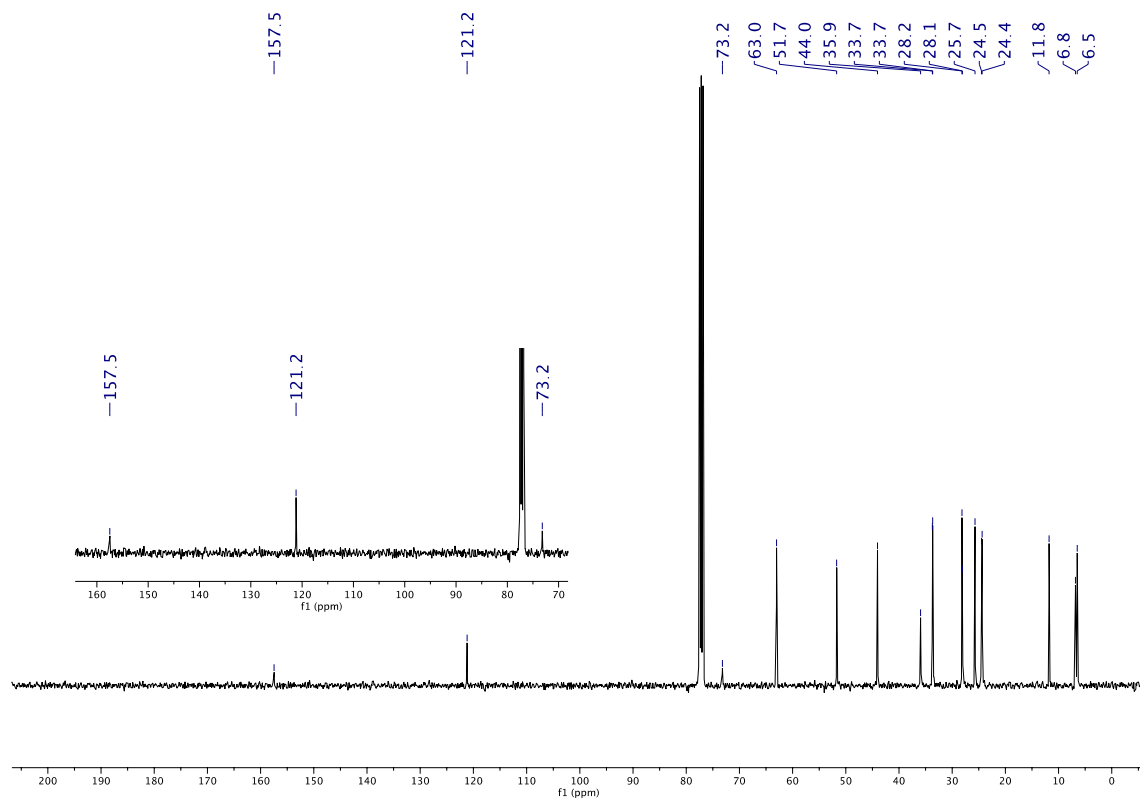

Figure 20. New submission  $^{13}\text{C}$  NMR spectrum in CDCl<sub>3</sub> of compound **2b**.

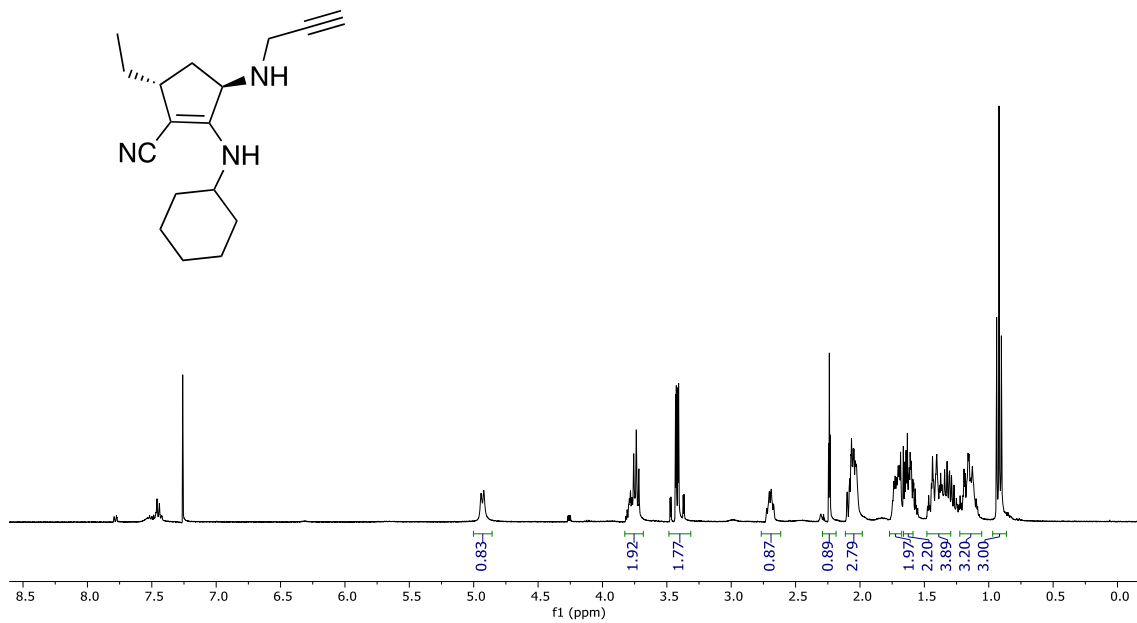

Figure 21. First submission <sup>1</sup>H NMR spectrum in CDCl<sub>3</sub> of compound **2e**.

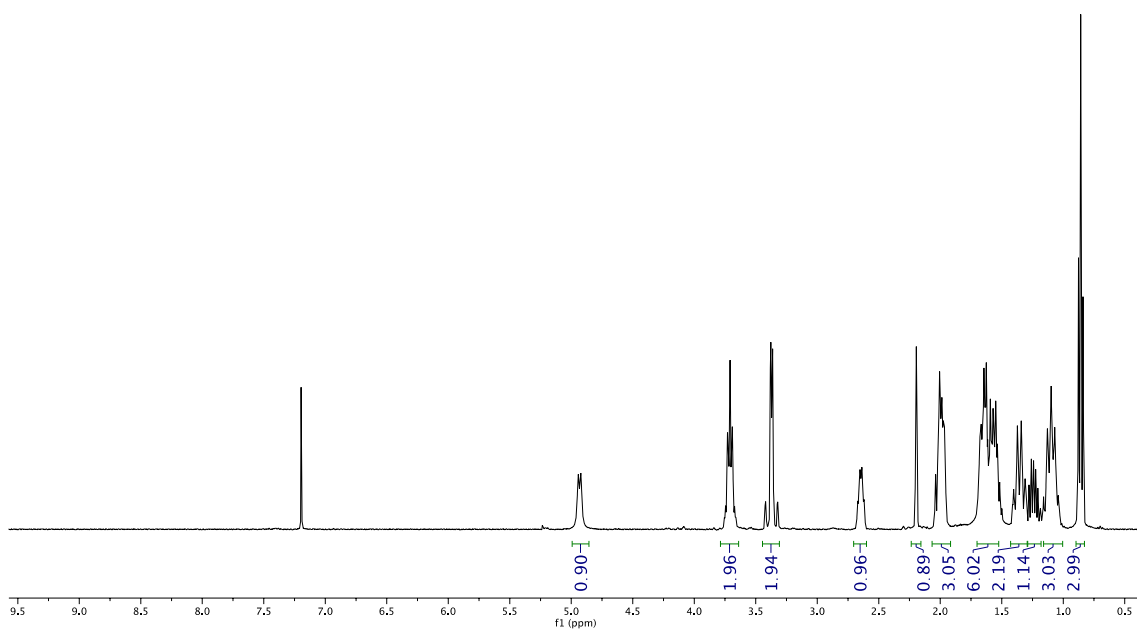

Figure 22. New submission <sup>1</sup>H NMR spectrum in CDCl<sub>3</sub> of compound **2e**.

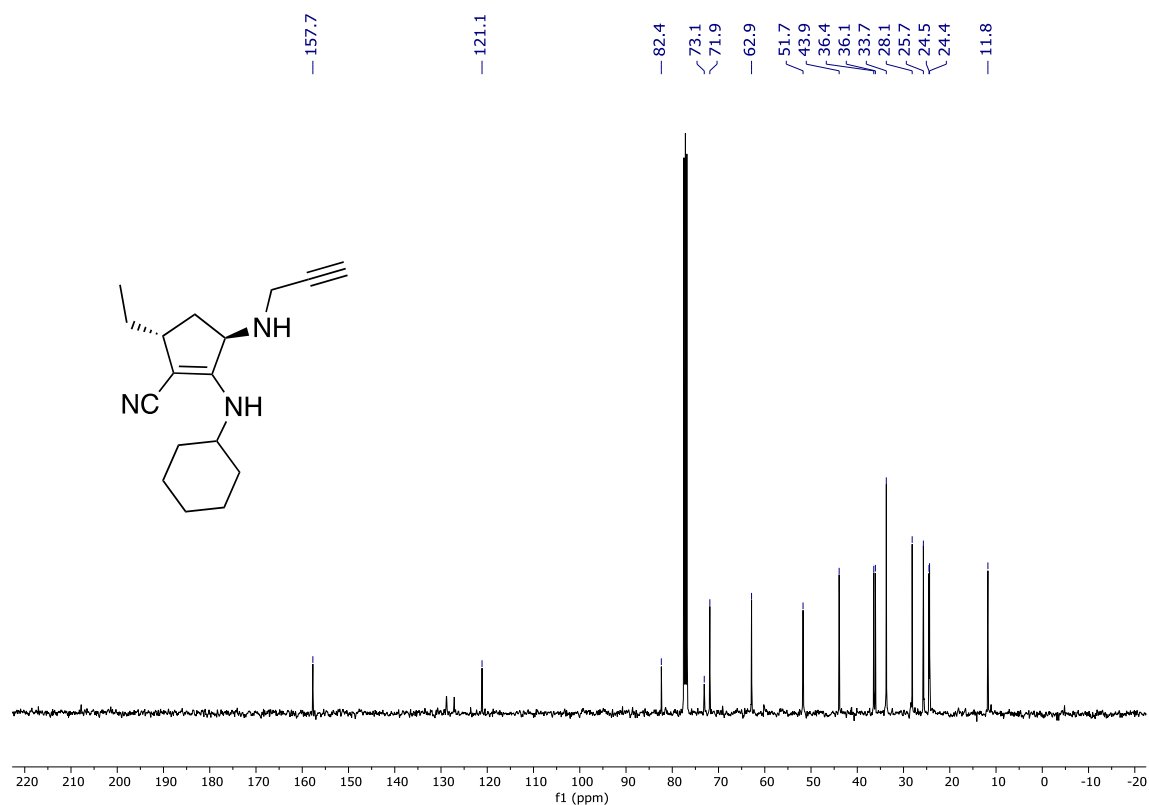

Figure 23. First submission <sup>13</sup>C NMR spectrum in CDCl<sub>3</sub> of compound **2e**.

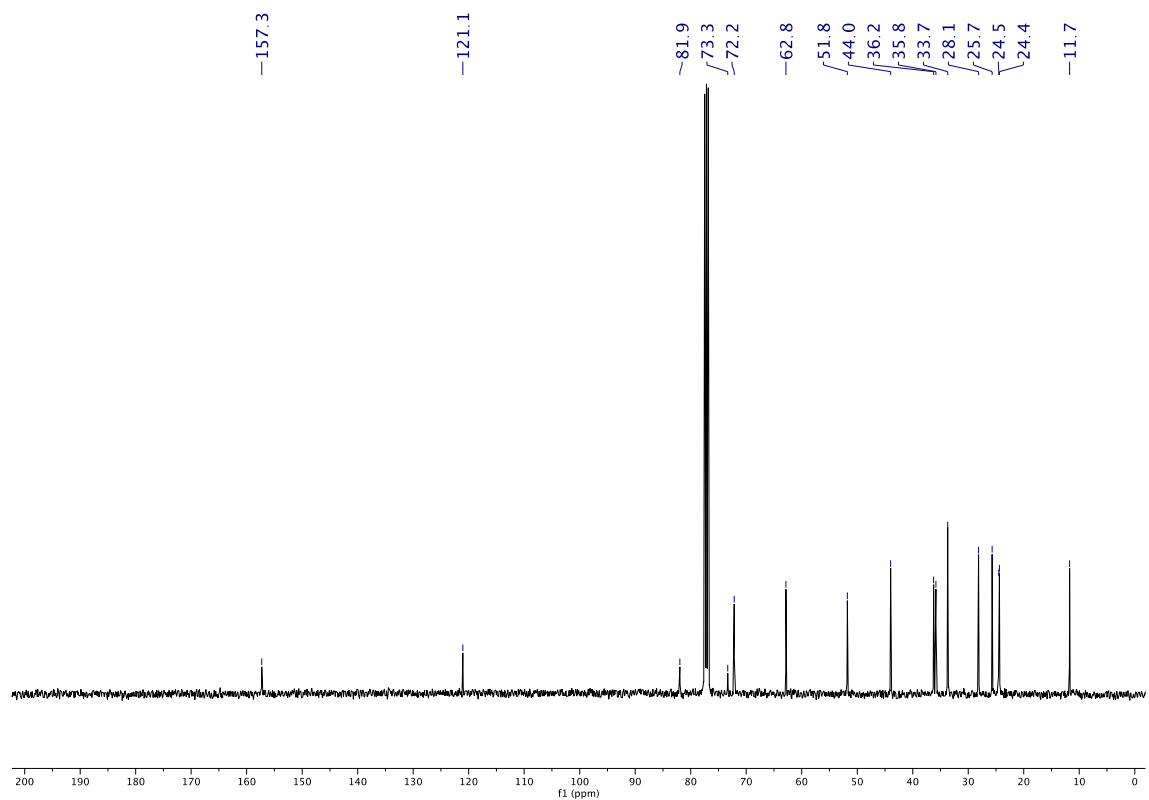

Figure 24. New submission <sup>13</sup>C NMR spectrum in CDCl<sub>3</sub> of compound **2e**.

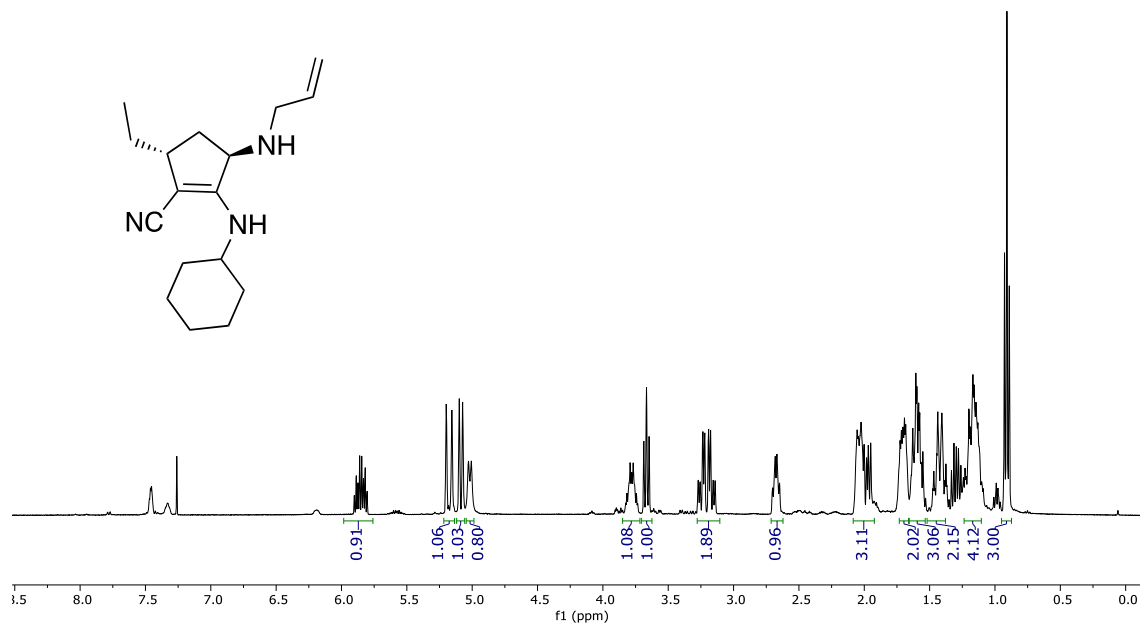

Figure 25. First submission <sup>1</sup>H NMR spectrum in CDCl<sub>3</sub> of compound **2f**.

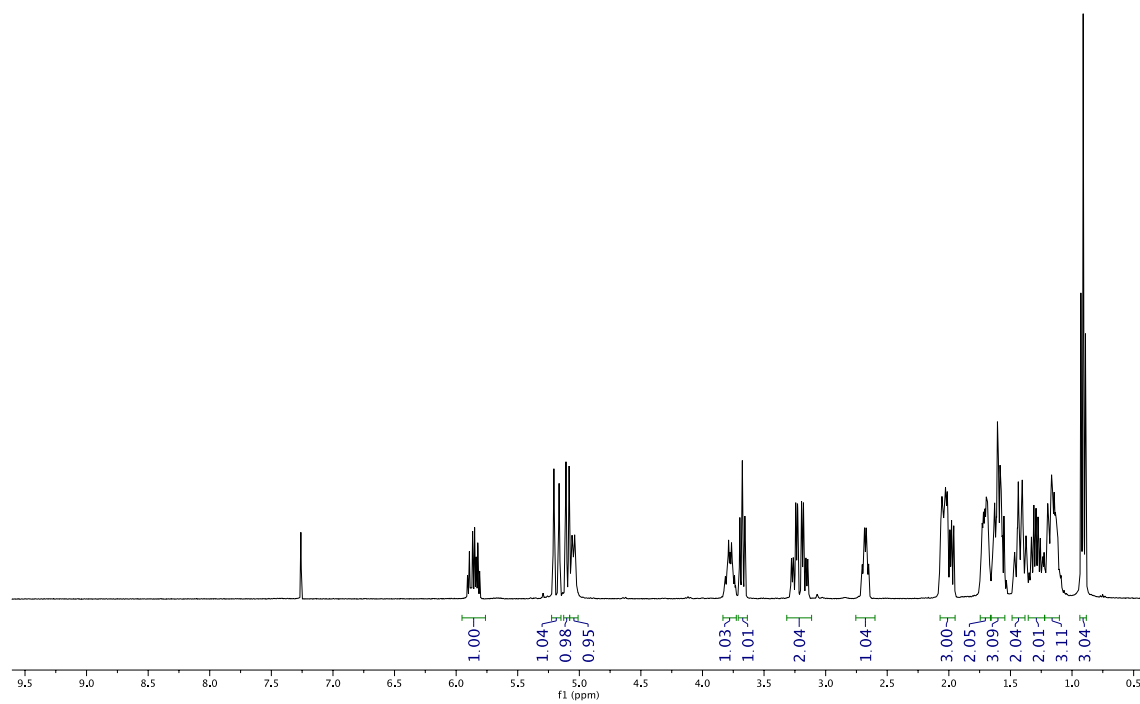

Figure 26. New submission <sup>1</sup>H NMR spectrum in CDCl<sub>3</sub> of compound **2f**.

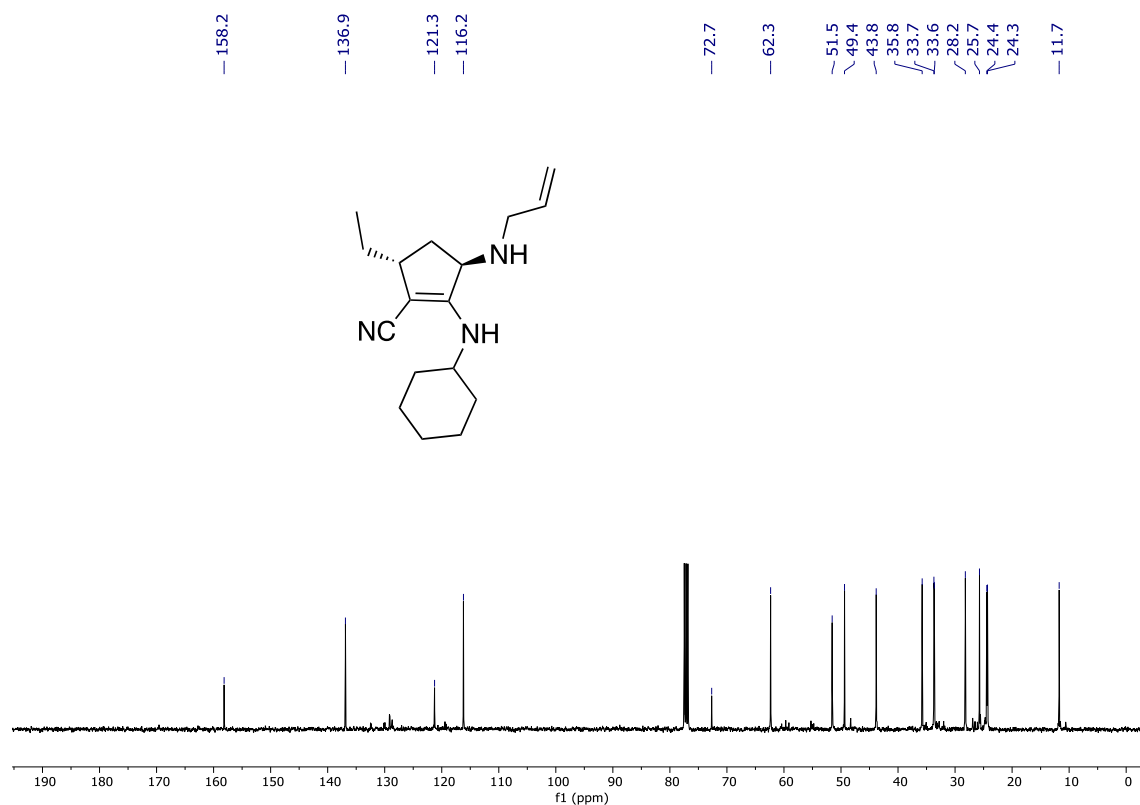

Figure 27. First submission <sup>13</sup>C NMR spectrum in CDCl<sub>3</sub> of compound **2f**.

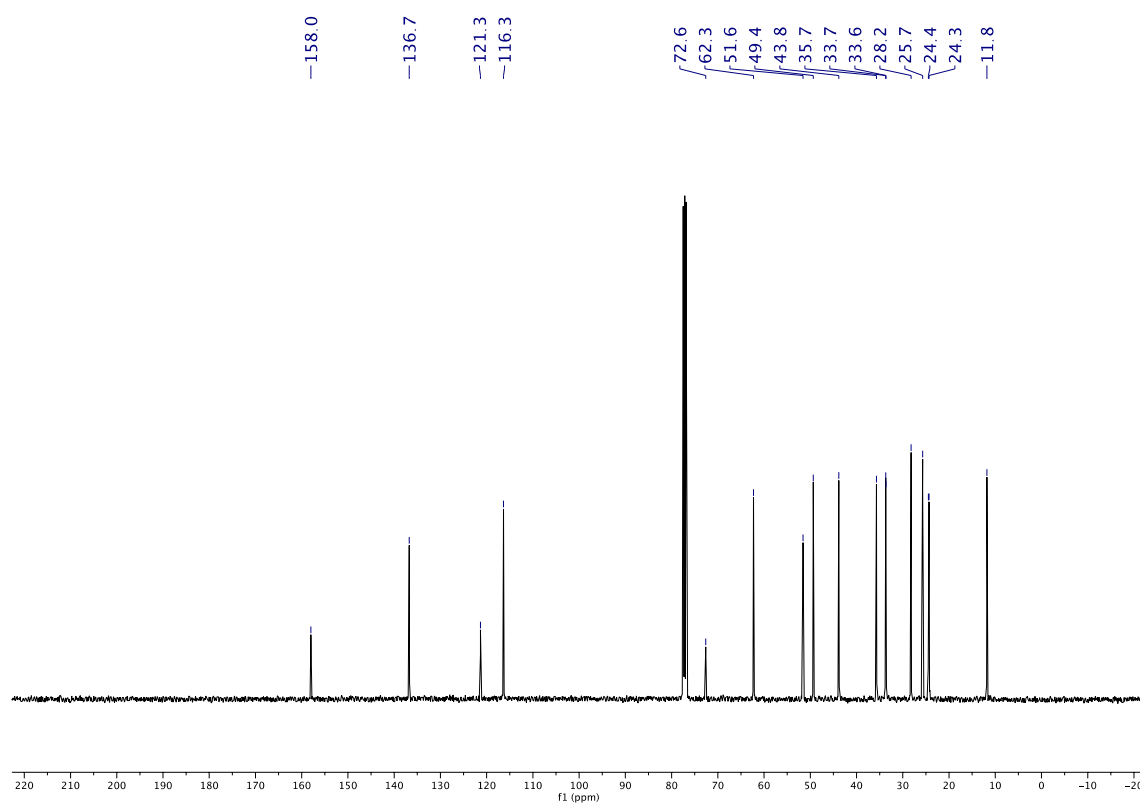

Figure 28. New submission <sup>13</sup>C NMR spectrum in CDCl<sub>3</sub> of compound **2f**.

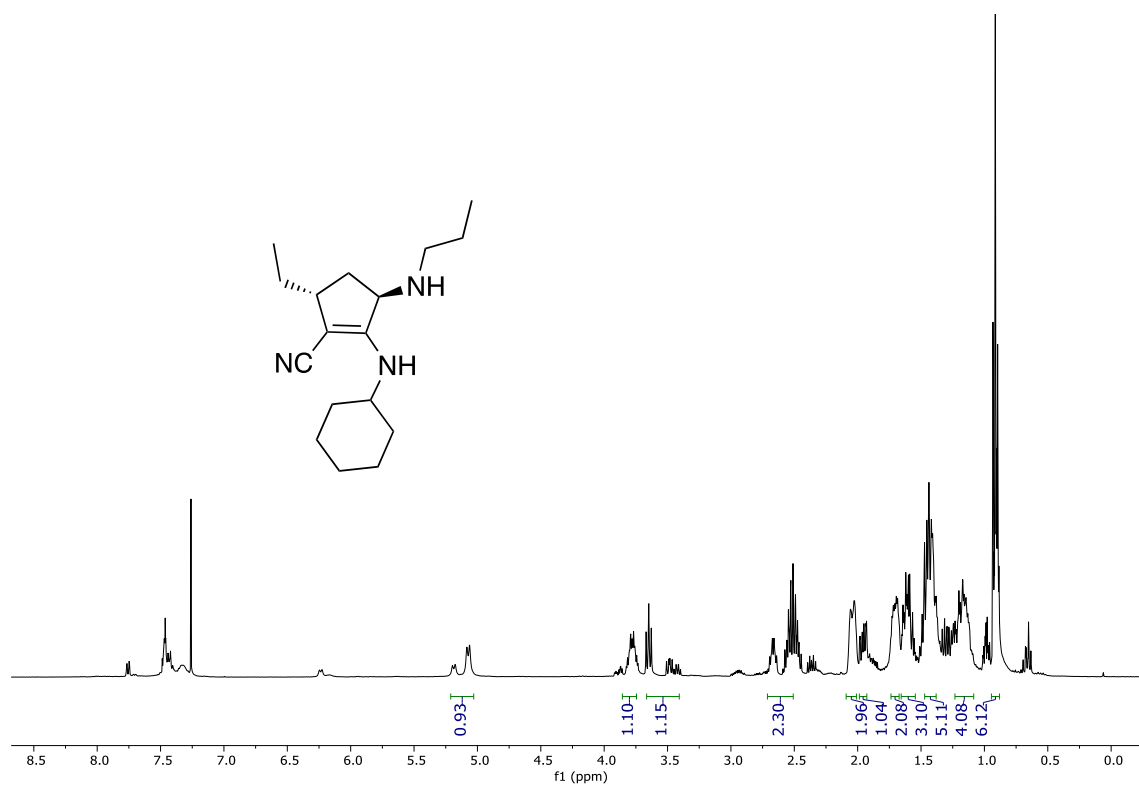

Figure 29. First submission <sup>1</sup>H NMR spectrum in CDCl<sub>3</sub> of compound **2g**.

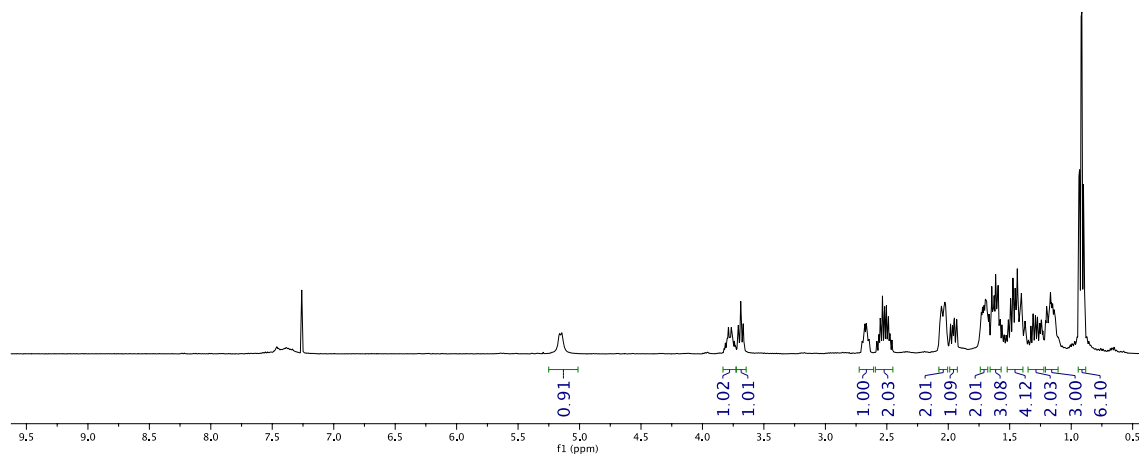

Figure 30. New submission <sup>1</sup>H NMR spectrum in CDCl<sub>3</sub> of compound **2g**.

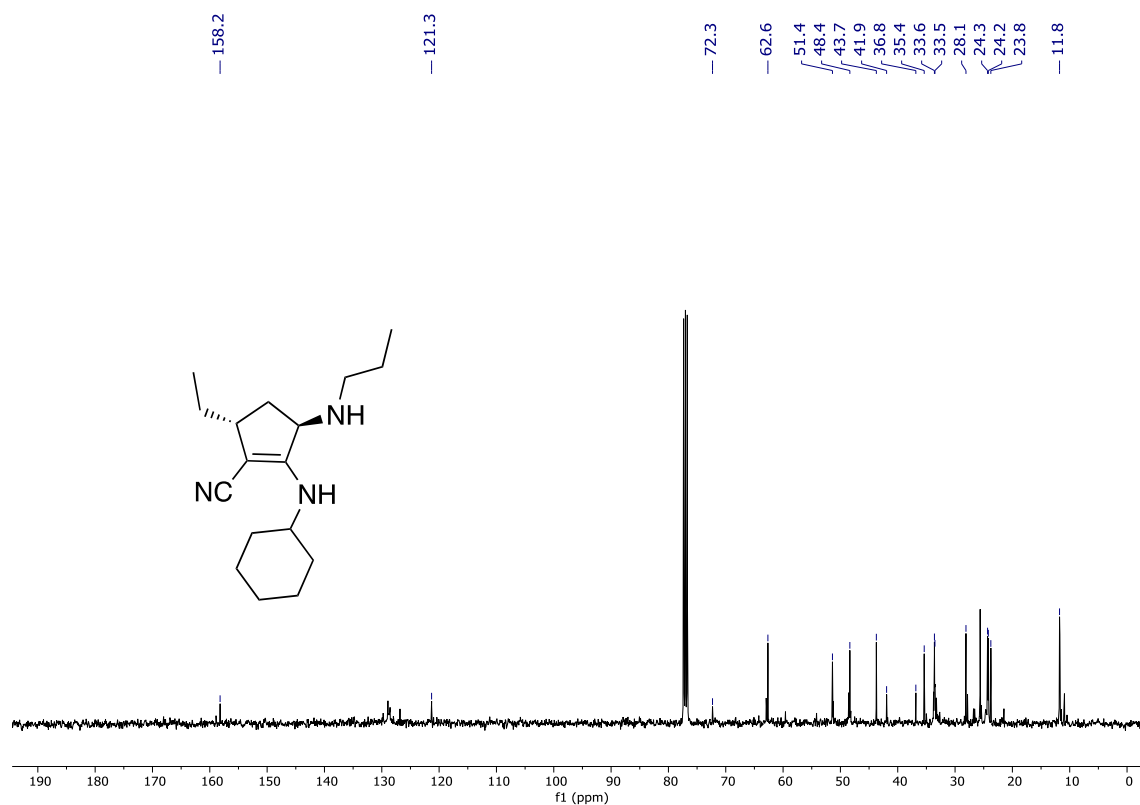

Figure 31. First submission <sup>13</sup>C NMR spectrum in CDCl<sub>3</sub> of compound **2g**.

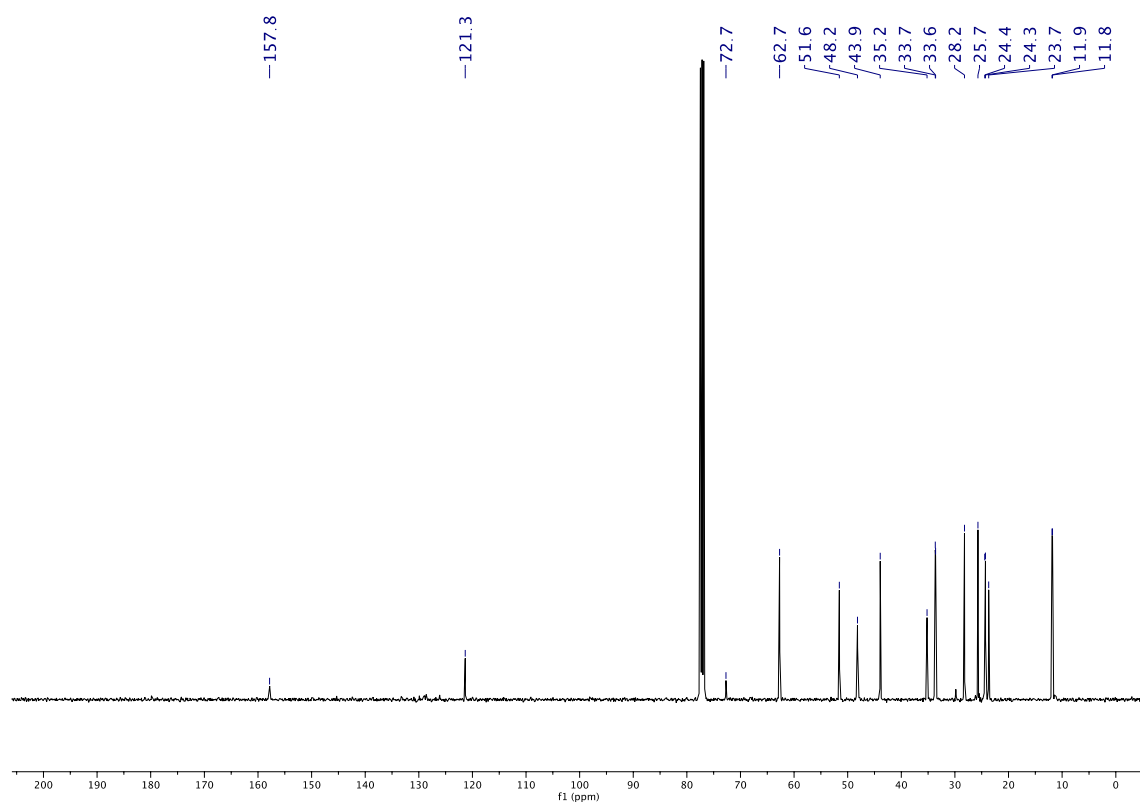

Figure 32. New submission <sup>13</sup>C NMR spectrum in CDCl<sub>3</sub> of compound **2g**.



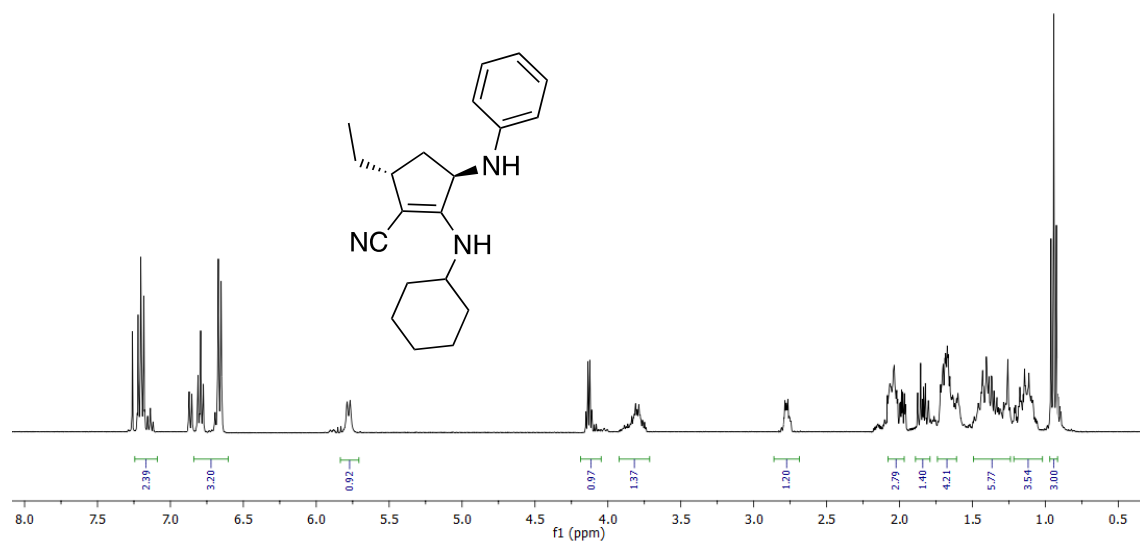

Figure 33. First submission <sup>1</sup>H NMR spectrum in CDCl<sub>3</sub> of compound **2k**.

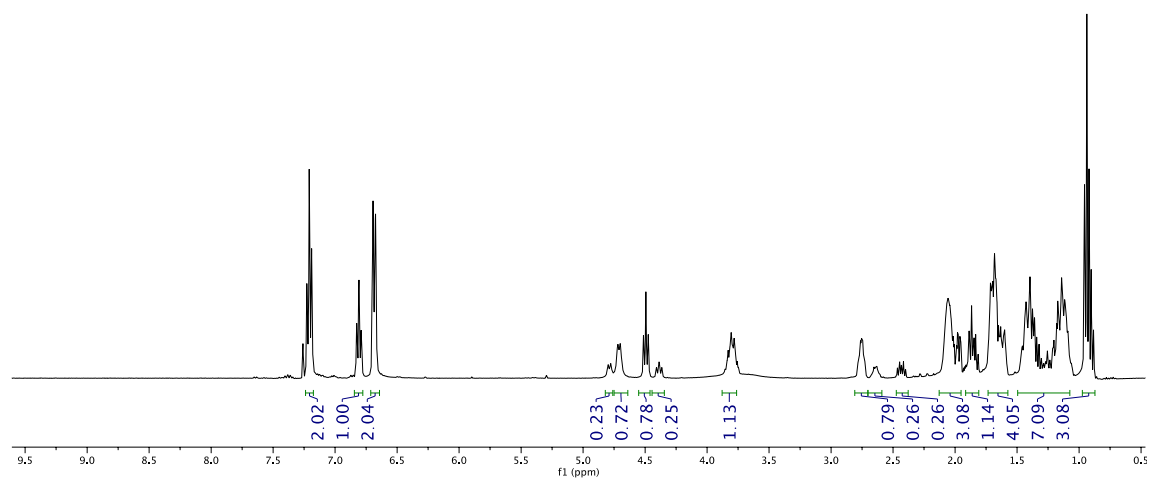

Figure 34. New submission <sup>1</sup>H NMR spectrum in CDCl<sub>3</sub> of compound **2k**.

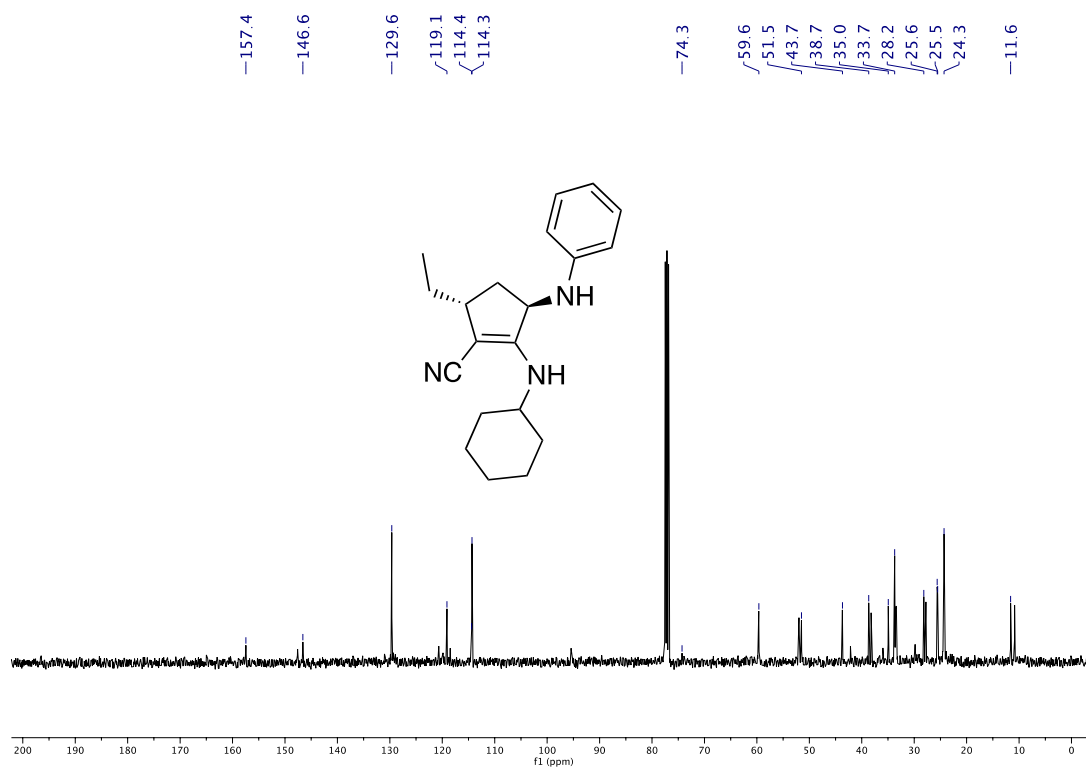

Figure 35. First submission <sup>13</sup>C NMR spectrum in CDCl<sub>3</sub> of compound **2k**.

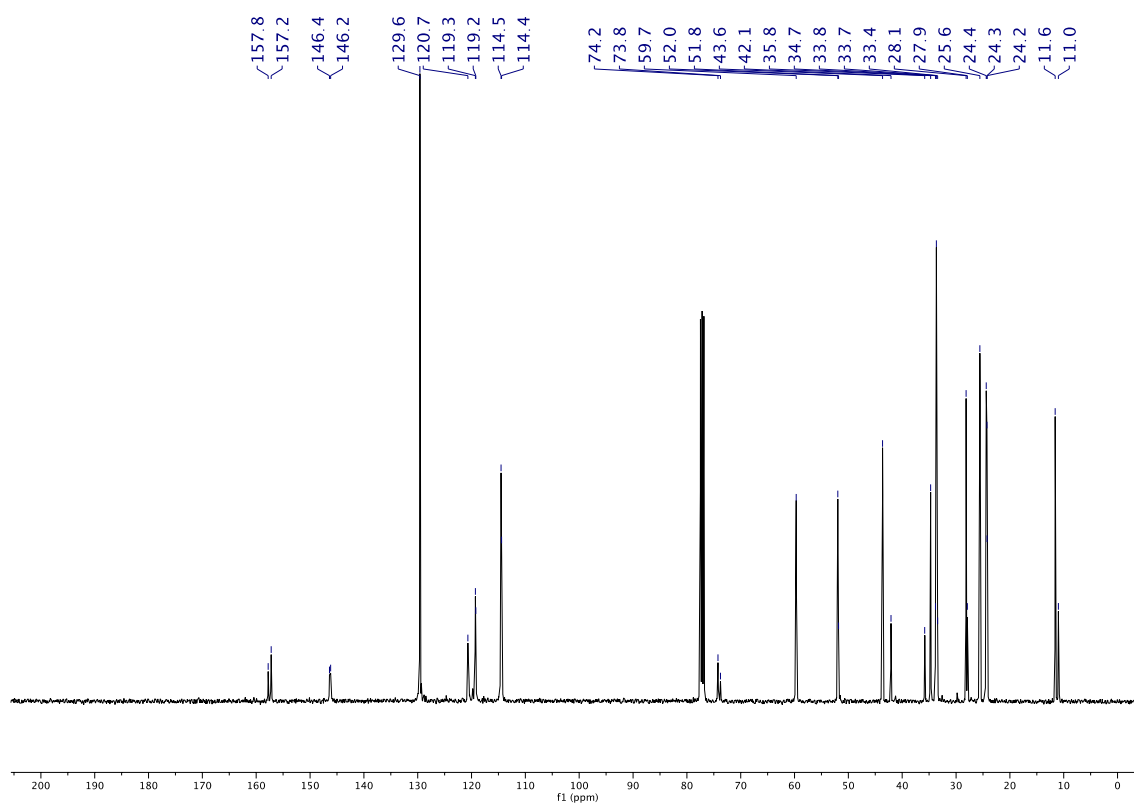

Figure 36. New submission <sup>13</sup>C NMR spectrum in CDCl<sub>3</sub> of compound **2k**.

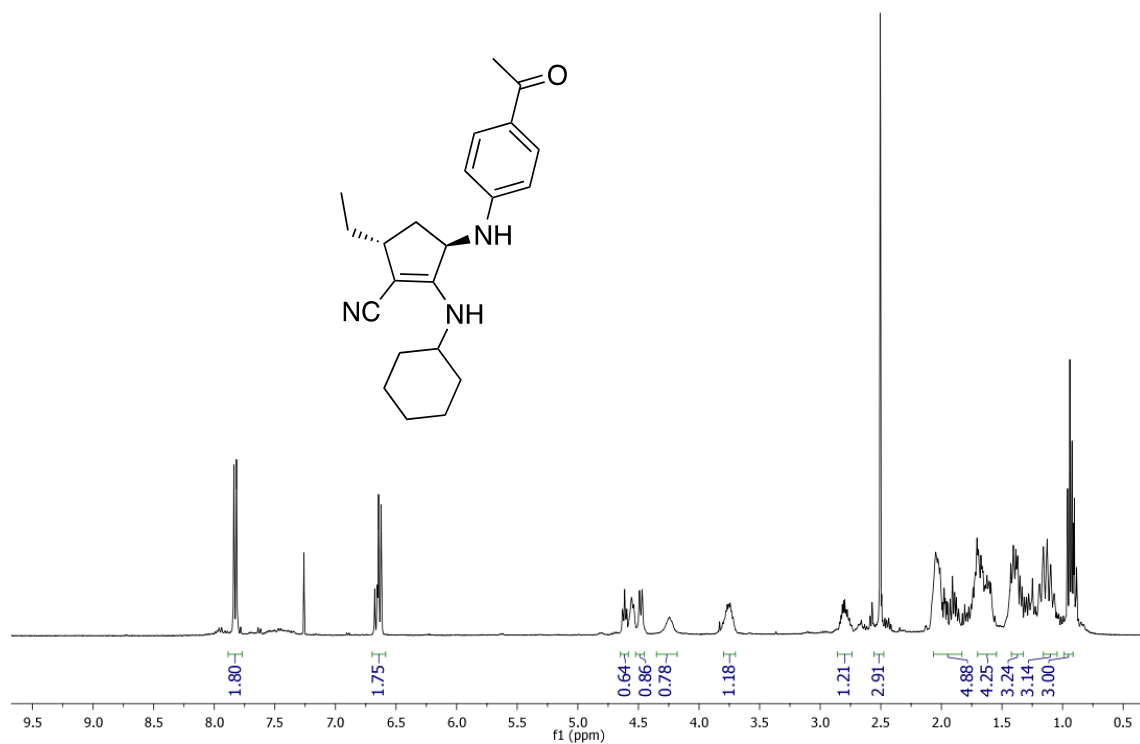

Figure 37. First submission <sup>1</sup>H NMR spectrum in CDCl<sub>3</sub> of compound **2p**.

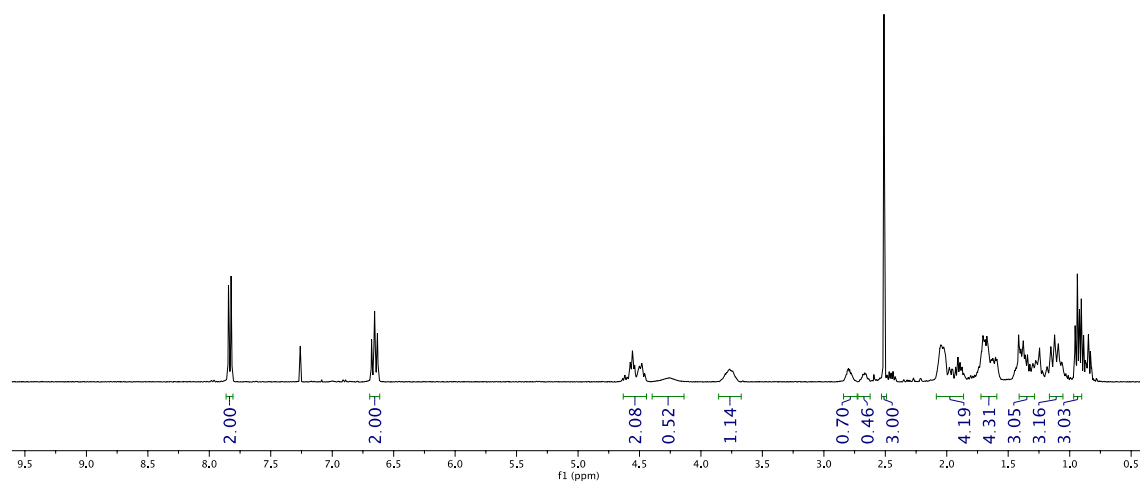

Figure 38. New submission <sup>1</sup>H NMR spectrum in CDCl<sub>3</sub> of compound **2p**.

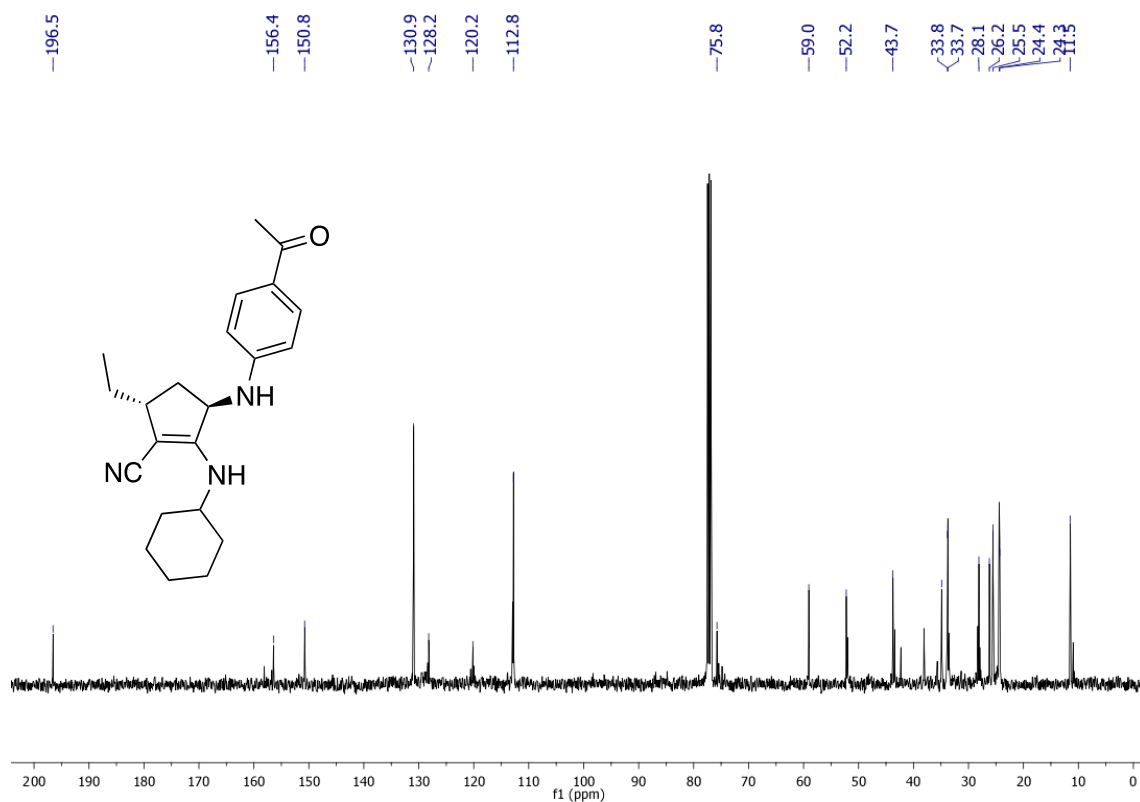

Figure 39. First submission <sup>13</sup>C NMR spectrum in CDCl<sub>3</sub> of compound **2p**.

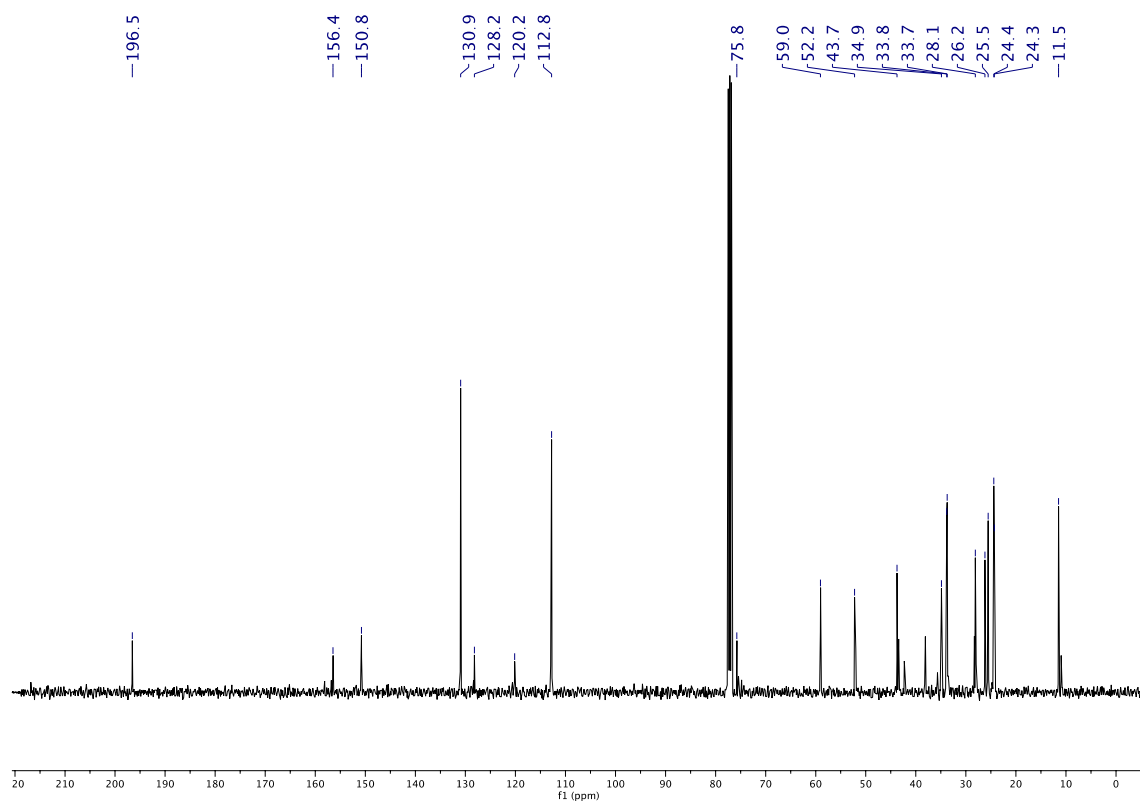

Figure 40. New submission <sup>13</sup>C NMR spectrum in CDCl<sub>3</sub> of compound **2p**.

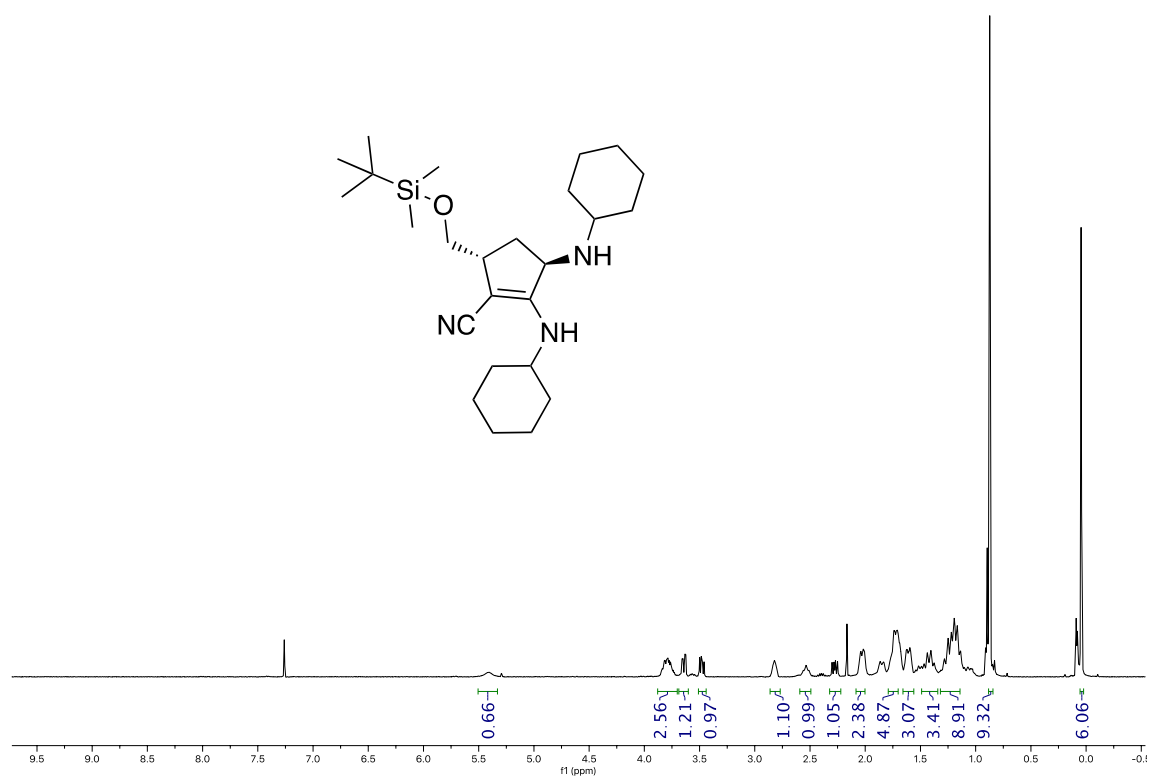

Figure 41. First submission <sup>1</sup>H NMR spectrum in CDCl<sub>3</sub> of compound **2ag**.

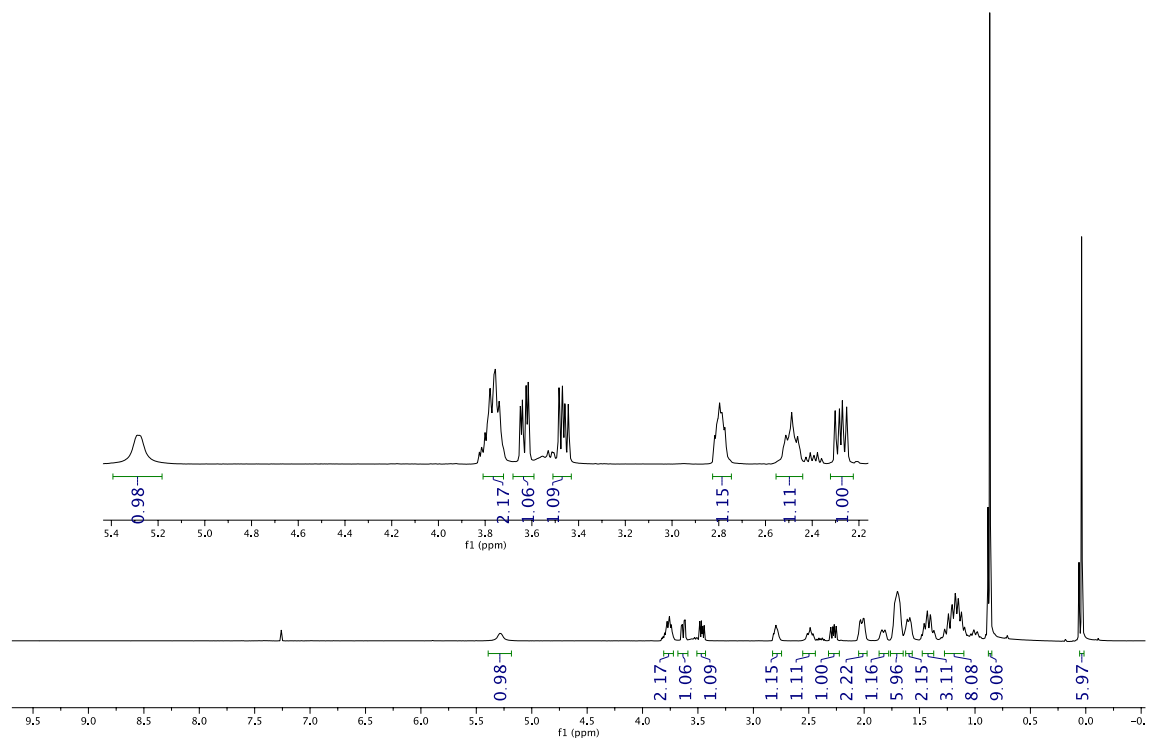

Figure 42. New submission <sup>1</sup>H NMR spectrum in CDCl<sub>3</sub> of compound **2ag**.

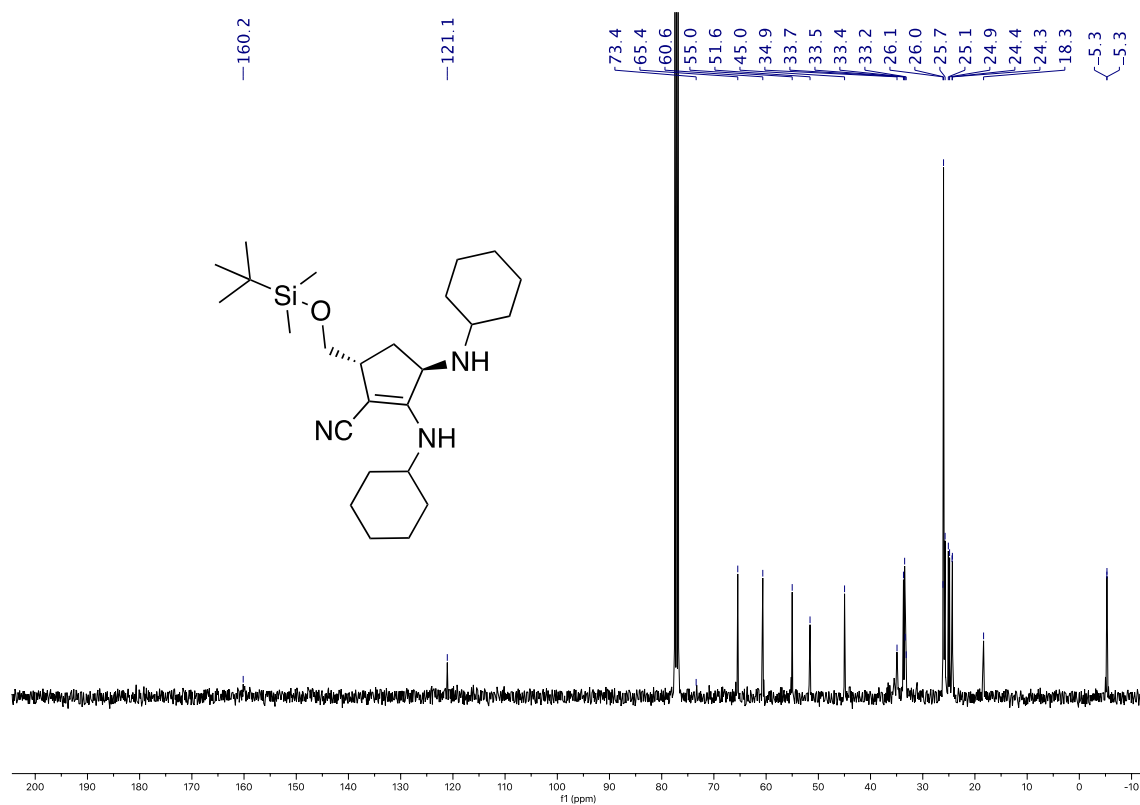

Figure 43. First submission <sup>13</sup>C NMR spectrum in CDCl<sub>3</sub> of compound **2ag**.

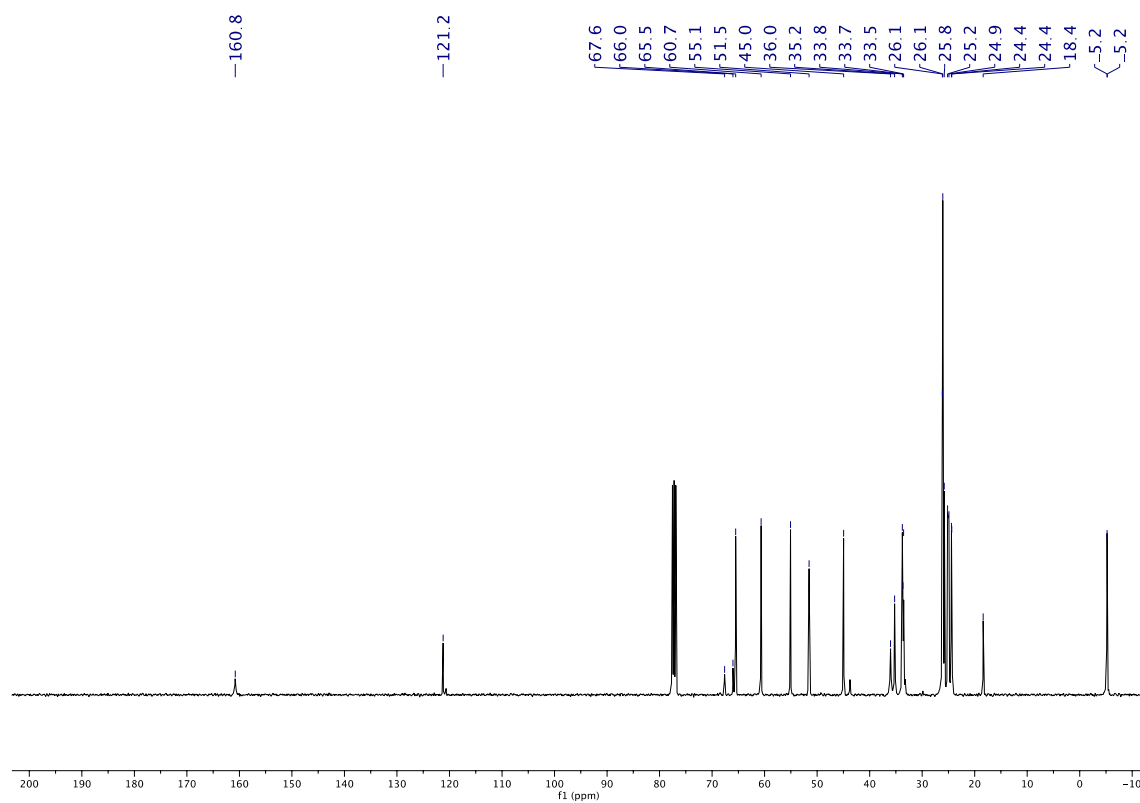

Figure 44. New submission <sup>13</sup>C NMR spectrum in CDCl<sub>3</sub> of compound **2ag**.

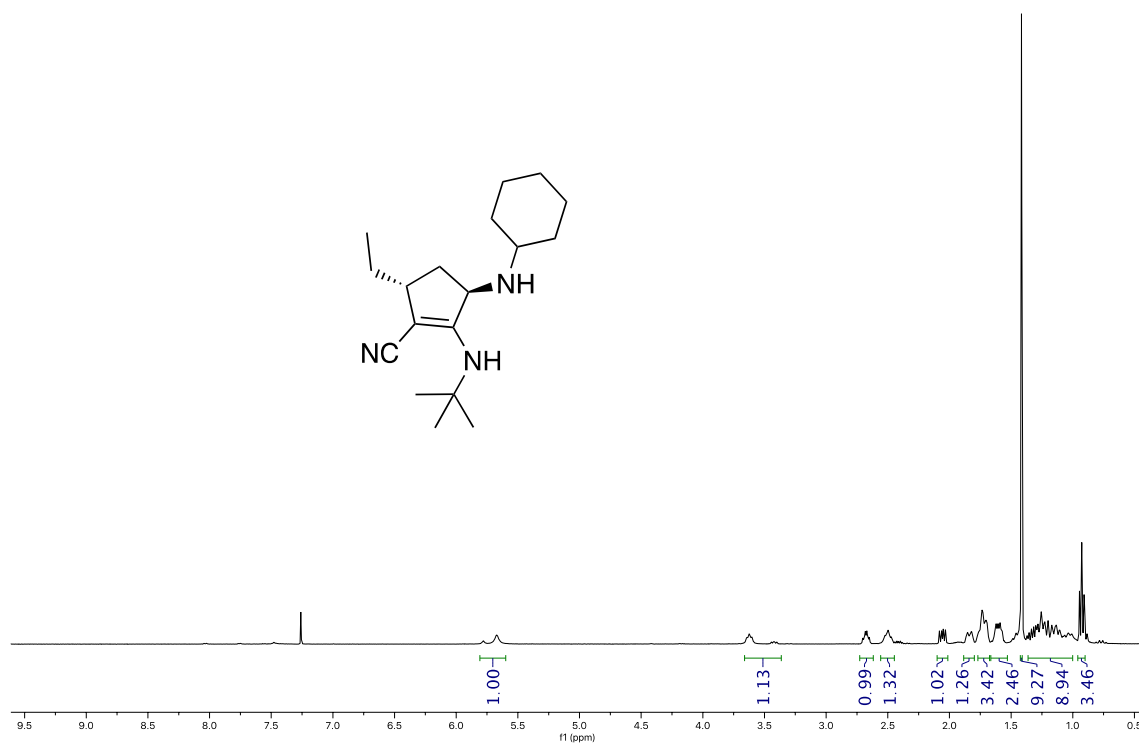

Figure 45. First submission <sup>1</sup>H NMR spectrum in CDCl<sub>3</sub> of compound **2ai**.

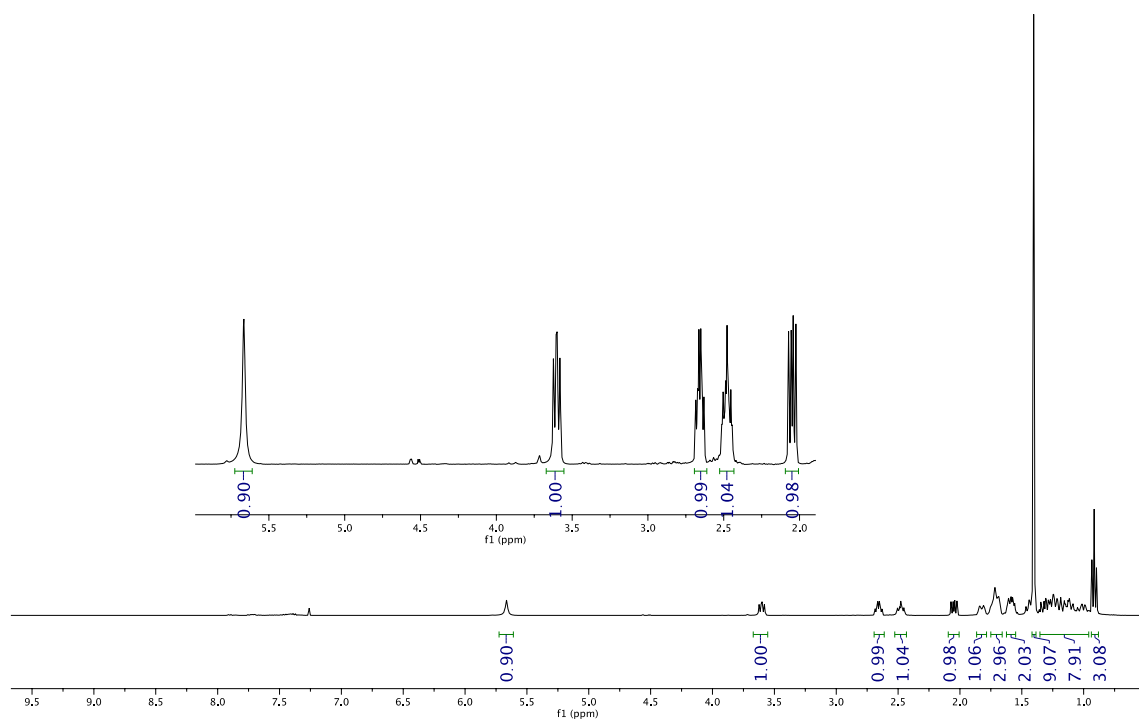

Figure 46. New submission <sup>1</sup>H NMR spectrum in CDCl<sub>3</sub> of compound **2ai**.

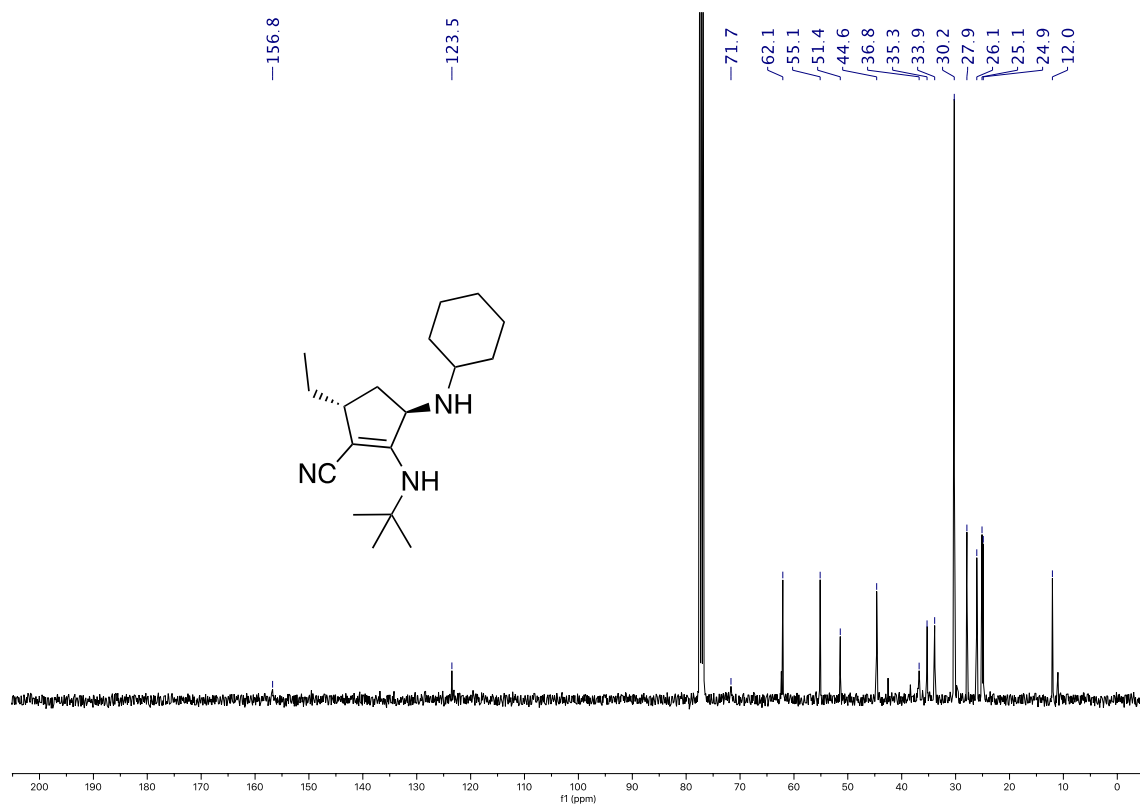

Figure 47. First submission <sup>13</sup>C NMR spectrum in CDCl<sub>3</sub> of compound **2ai**.

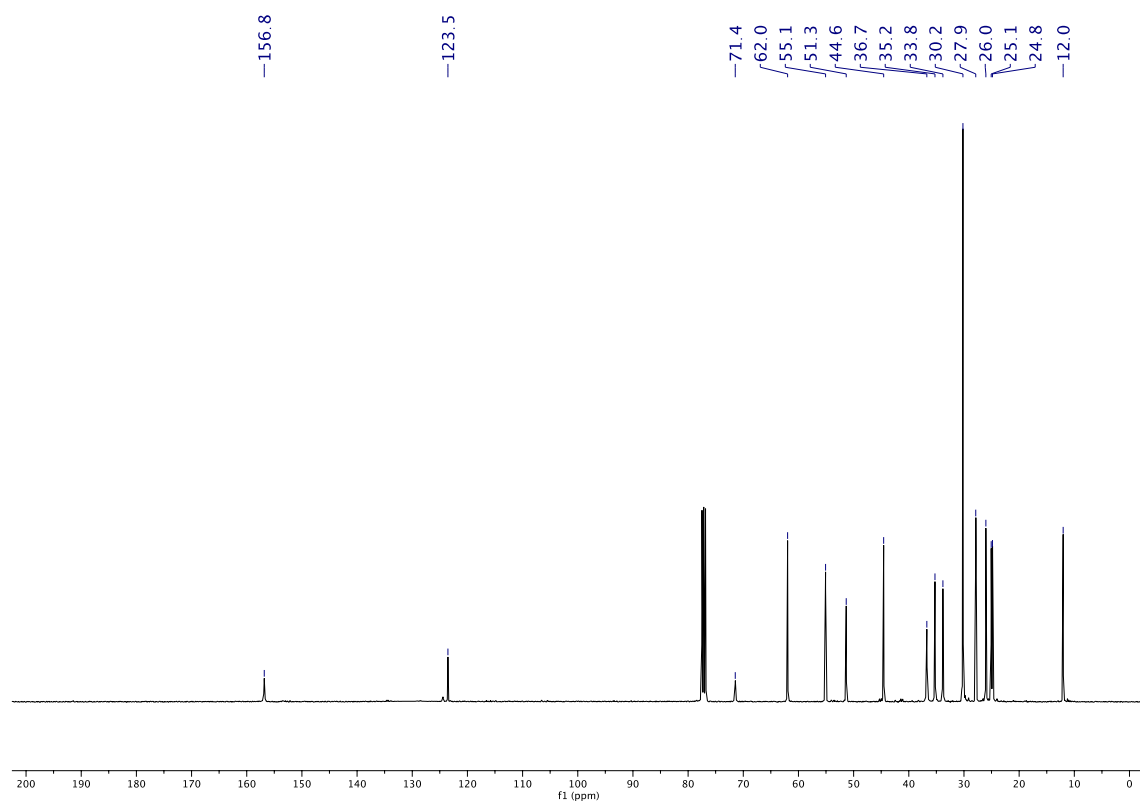

Figure 48. New submission <sup>13</sup>C NMR spectrum in CDCl<sub>3</sub> of compound **2ai**.



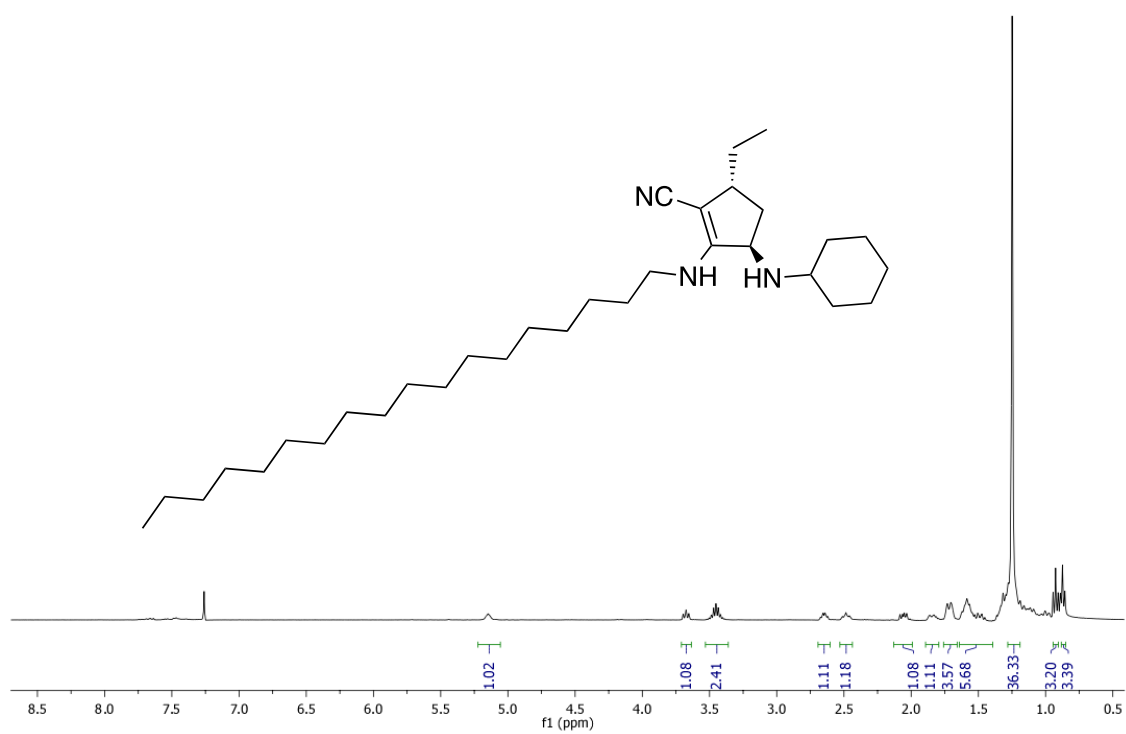

Figure 49. First submission <sup>1</sup>H NMR spectrum in CDCl<sub>3</sub> of compound **2aj**.

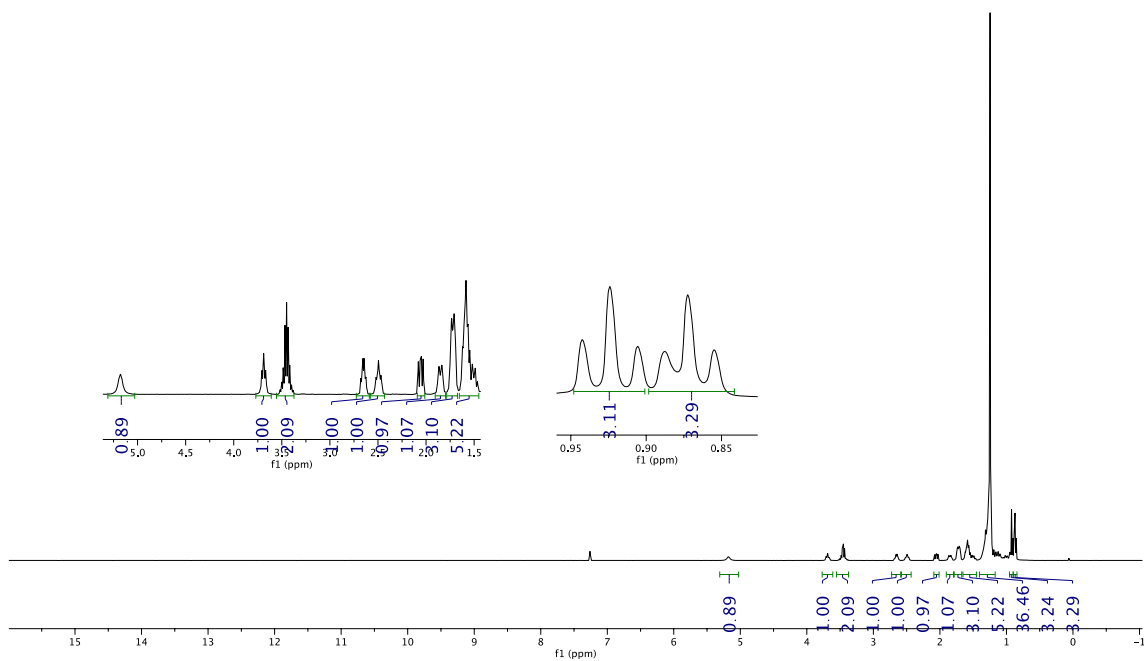

Figure 50. New submission <sup>1</sup>H NMR spectrum in CDCl<sub>3</sub> of compound **2aj**.

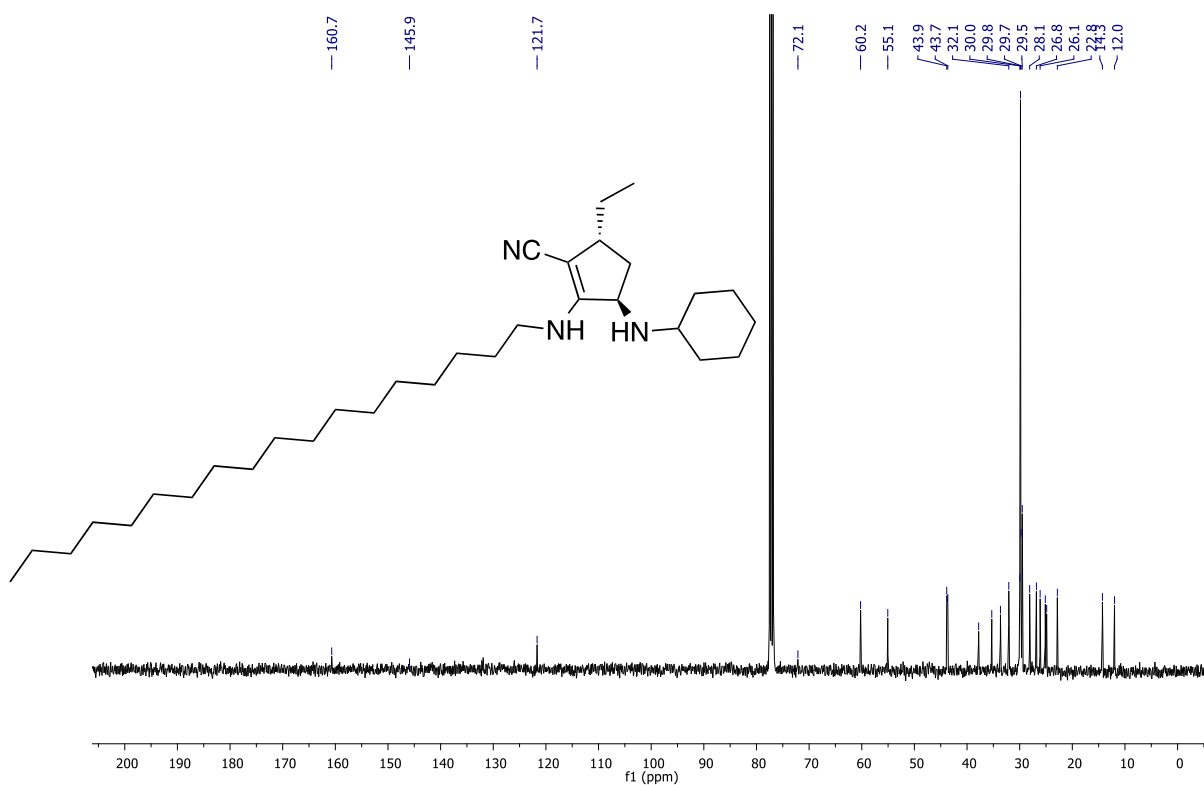

Figure 51. First submission <sup>13</sup>C NMR spectrum in CDCl<sub>3</sub> of compound **2aj**.

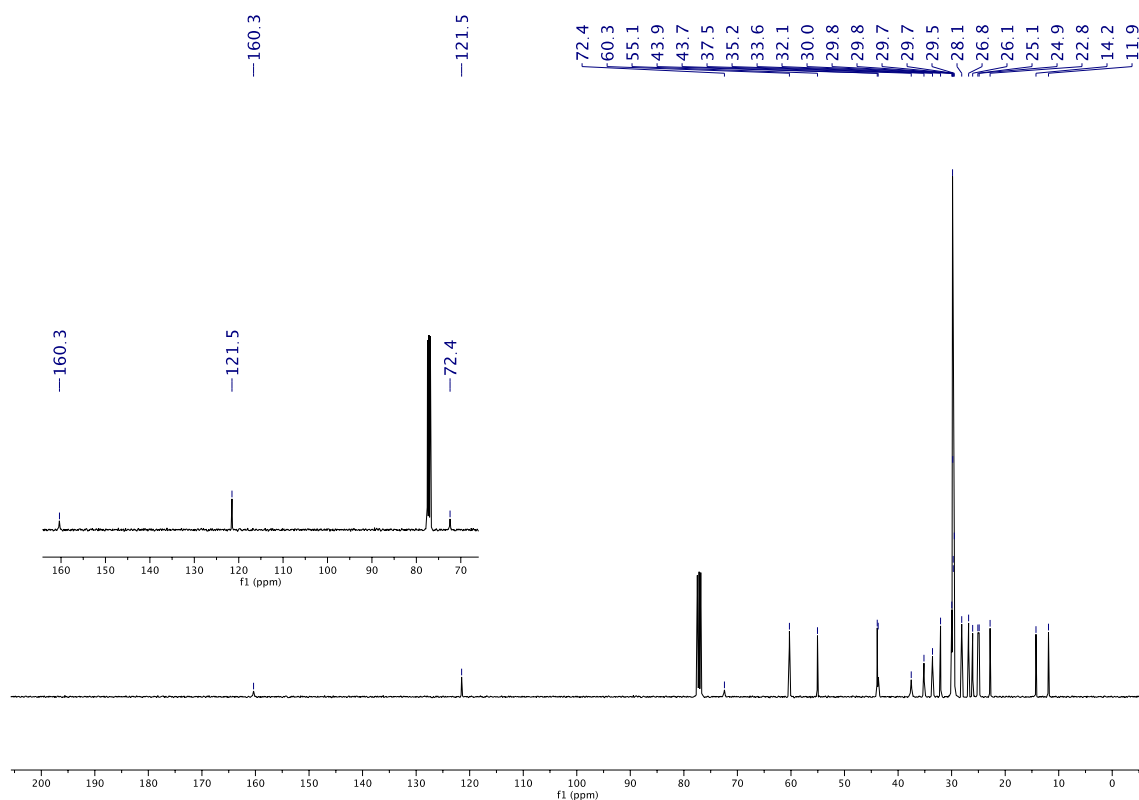

Figure 52. New submission <sup>13</sup>C NMR spectrum in CDCl<sub>3</sub> of compound **2aj**.

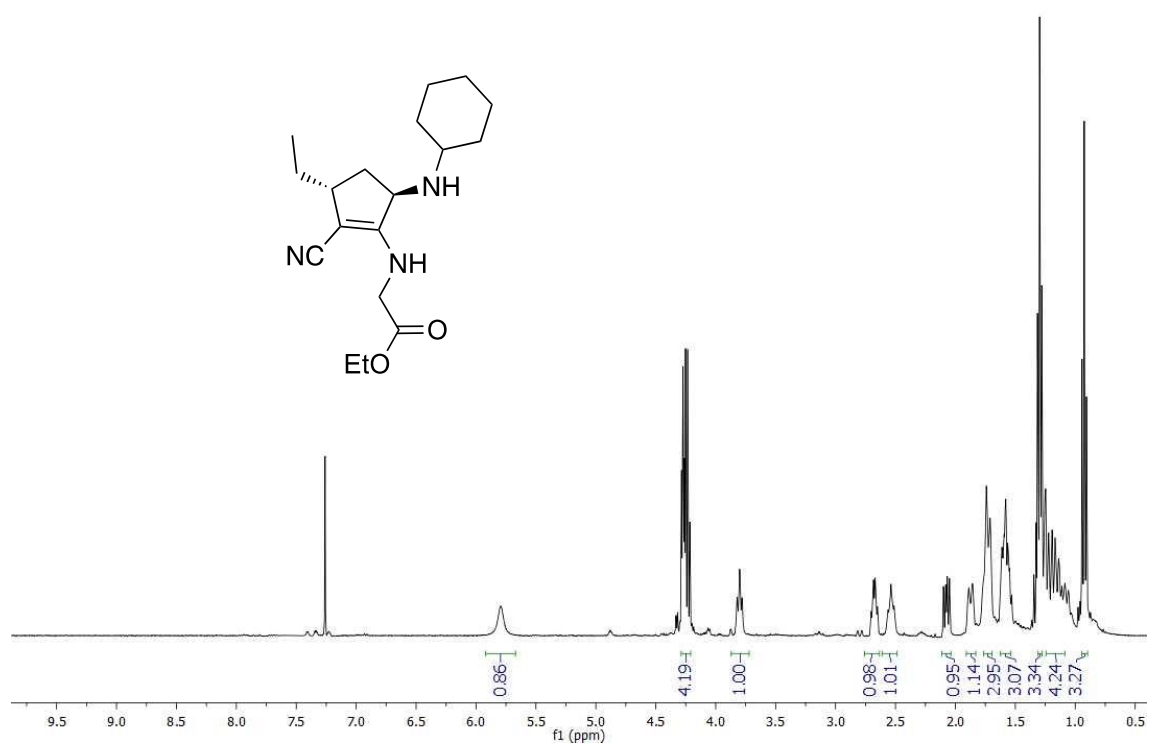

Figure 53. First submission <sup>1</sup>H NMR spectrum in CDCl<sub>3</sub> of compound **2ak**.

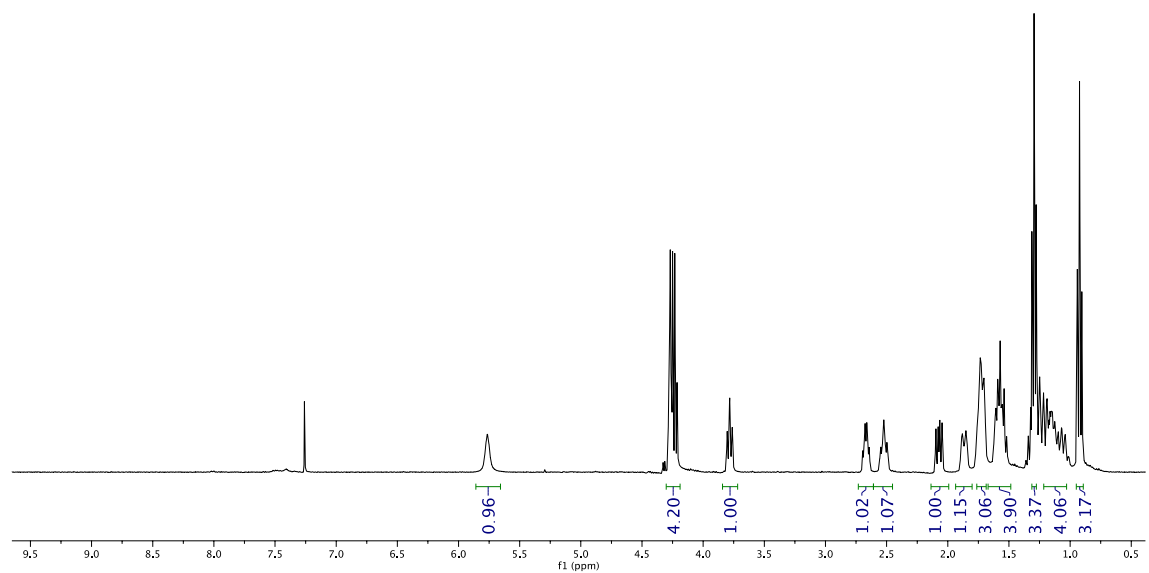

Figure 54. New submission <sup>1</sup>H NMR spectrum in CDCl<sub>3</sub> of compound **2ak**.

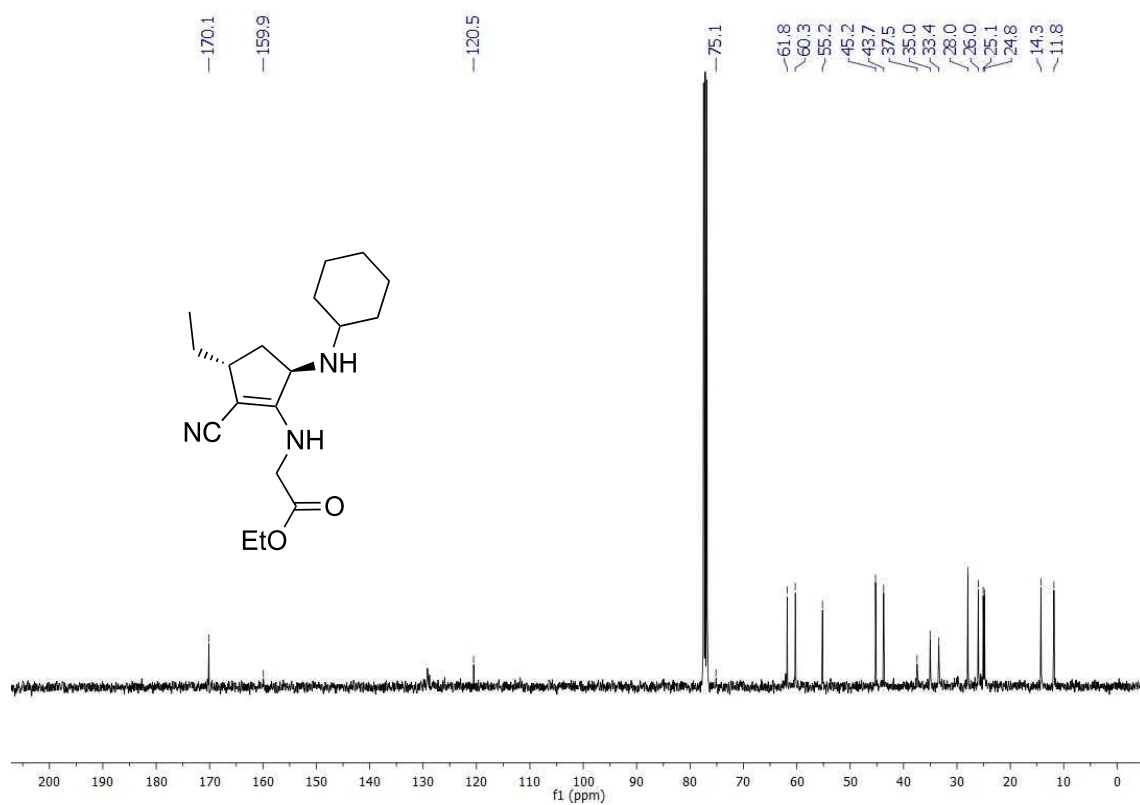

Figure 55. First submission <sup>13</sup>C NMR spectrum in CDCl<sub>3</sub> of compound **2ak**.

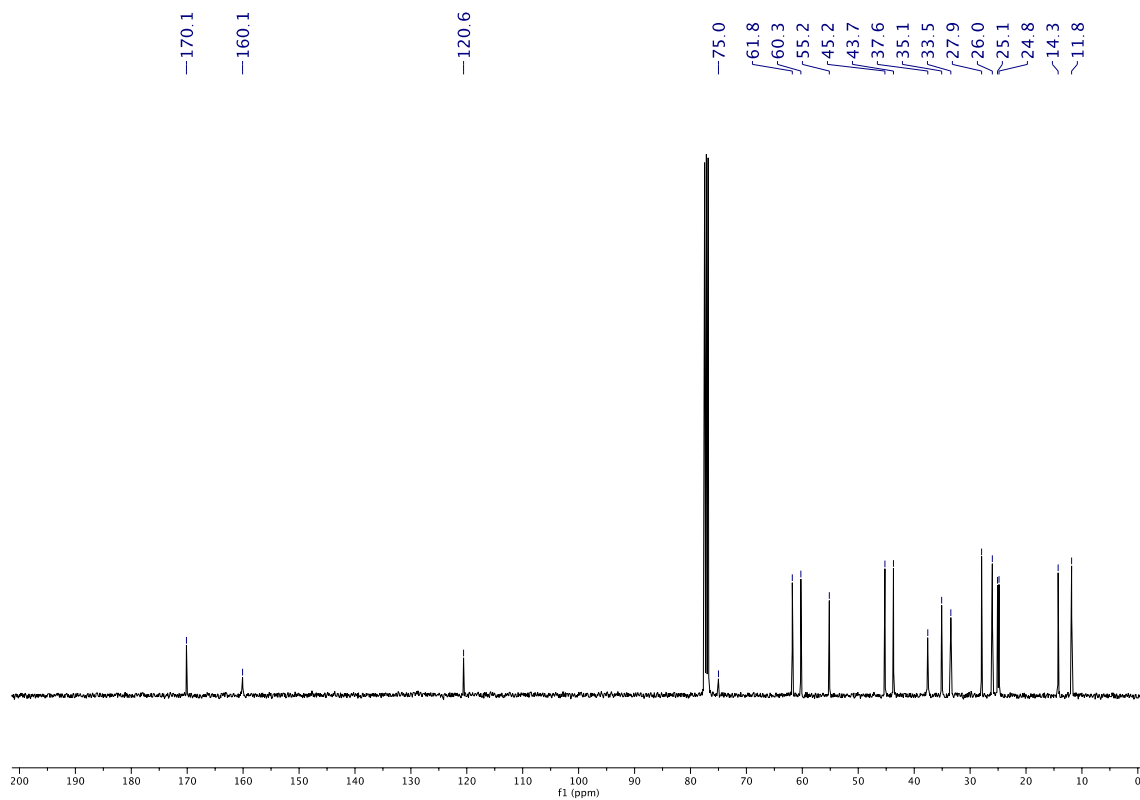

Figure 56. New submission <sup>13</sup>C NMR spectrum in CDCl<sub>3</sub> of compound **2ak**.
